# Supplementary material for: Cell-type-specific genome editing with a microRNA-responsive CRISPR–Cas9 switch
Source: PubMed Central journal article supplement — Nucleic Acids Res. 2017 May 19;45(13):e118. doi: 10.1093/nar/gkx309 (PMC5570128; doi:10.1093/nar/gkx309), 2017-05-19
Supplement: gkx309_supp.pdf [file gkx309_supp.pdf]

## Supplementary Information

### Cell-type-specific genome editing with a microRNA-responsive CRISPR-Cas9 switch

Moe Hirosawa<sup>1,2</sup>, Yoshihiko Fujita<sup>1</sup>, Callum J.C Parr<sup>1</sup>, Karin Hayashi<sup>1</sup>, Shunnichi Kashida<sup>1</sup>, Akitsu Hotta<sup>1</sup>, Knut Woltjen<sup>1,3</sup>, and Hirohide Saito\*<sup>1</sup>.

<sup>1</sup> Department of Life Science Frontiers, Center for iPS Cell Research and Application (CiRA), Kyoto University, Kyoto, Japan.

<sup>2</sup> Graduate School of Medicine, Kyoto University, Kyoto, Japan.

<sup>3</sup> Hakubi Center for Advanced Research, Kyoto University, Kyoto, Japan.

This file includes:

Supplementary Text

Supplementary Methods

Supplementary Figures S1 to S10

Supplementary Table S1: Primers and oligo DNAs for RNAs

Supplementary Table S2: Primers for T7E1 assay

Supplementary Table S3: qPCR primers used in this study

Supplementary Table S4: List of PCR reactions

Supplementary Table S5: RNA sequences used in this study

Supplementary Table S6: Plasmid sequences used in this study

Supplementary Table S7: Transfection tables for all experiments in this study

Supplementary References

## Supplementary Text

### Engineering miR-Cas9 switch and sgRNA that target EGFP

We noticed that Cas9 activity from control Cas9 mRNA was originally lower in hiPSCs than HeLa cells, although we observed a difference in Cas9 activity using control Cas9 mRNA and miR-302-Cas9 switches in hiPSCs (Supplementary Figure S4A). Our initial sgRNA<sub>GFP</sub> contained an additional GG sequence at the 5' region to facilitate *in vitro* transcription by T7 RNA polymerase. A previous report showed that the extra nucleotides at the 5' end could affect mutation frequencies at on-target and off-target sites (1). To check the effect of the GG sequences in sgRNA<sub>GFP</sub>, we removed them from sgRNA<sub>GFP</sub> (sgRNA2<sub>GFP</sub>) and found that sgRNA2<sub>GFP</sub> with Cas9 mRNA showed higher Cas9 activity compared with the original sgRNA<sub>GFP</sub> (Supplementary Figure S4A vs Supplementary Figure S4B). However, we also observed leaky expression of Cas9 in cells transfected with miR-302-Cas9 switch, sgRNA2<sub>GFP</sub>, and negative miRNA inhibitor (Supplementary Figure S4B).

We therefore aimed to improve the sensitivity of miR-Cas9 switches to avoid leaky Cas9 expression in the target cells (Supplementary Figure S4B). We inserted four copies of the anti-miR sequence in the 5'-UTR region of the switch (4x miR-302-Cas9 switch) and found that this switch improved sensitivity to the target miR-302 and reduced leaky Cas9 expression in iPSCs (Figure 3A).

We also tuned the amount of miR-Cas9 switch and sgRNA. Consequently, we optimized conditions and improved Cas9 activity with lower leaky expression in the presence of miR-302 in hiPSCs (Supplementary Figure S4C).

## **Supplementary Methods**

### **Evaluation of miRNA expression level**

Relative miRNA expression level was quantified using TaqMan<sup>®</sup> MicroRNA Cells-to-C<sub>T</sub><sup>™</sup> Kit (Ambion). Cell lysate containing total RNA was reverse transcribed using has-miR-21-5p (Assay ID: 000397), 302a-5p (Assay ID: 002381) and RNU6B (Assay ID: 001093) TaqMan probes (Applied Biosystems). Quantitative PCR (qPCR) was performed with the TaqMan probes, and samples were analyzed using a StepOne Plus Real-Time PCR System (Applied Biosystems). Target miRNA was normalized to the the small RNA RNU6B and analyzed by  $\Delta\Delta C_t$  method.

### **Evaluation of Cas9 protein expression level**

After PBS wash, cells were lysed by adding 50  $\mu$ L M-PER cocktail (contains M-PER<sup>®</sup> Mammalian Protein Extraction Reagent (ThermoFisher), protease inhibitor, PMSF). After shaking for 5 min, lysate was collected into a 1.5 mL tube and centrifuged at 12400 rpm at 4°C for 10 min. The supernatant was collected and used in a BCA assay using Pierce<sup>™</sup> BCA Protein Assay Kit (ThermoFisher) following the manufacturer's protocol. The protein in the cell lysates were diluted to 0.5 mg/mL and analyzed using automated capillary electrophoresis-based immunoblotting with the Wes (ProteinSimple) following the manufacturer's protocol. Cas9 antibody (Active Motif) and GAPDH antibody (Santa Cruz) were

diluted 1 : 50 and 1 : 100, respectively. To detect primary antibody, anti-mouse and anti-rabbit antibodies (ProteinSimple) were used.

### **Cell killing assay by targeting Alu1 element**

We collected all cell samples at 48 h after RNA transfection. After washing with PBS, normal HeLa cells were treated with 100  $\mu$ L 0.25% trypsin-EDTA, incubated at 37°C with 5% CO<sub>2</sub> for 5 min, and then 100  $\mu$ L cultured medium was added. After the cell suspension was collected, it was centrifuged at 1000 rpm at room temperature for 5 min. The supernatant was discarded and the remaining cell pellet was washed with PBS and centrifuged (1000 rpm) at room temperature for 5 min. After aspirating supernatant, cell samples were stained with 2.5  $\mu$ L annexin V, Alexa Fluor 488 conjugate (Life Technologies) and 0.5  $\mu$ L SYTOX Red dead-cell stain in 50  $\mu$ L Annexin-binding buffer 5x (Life Technologies). Samples were analyzed on an Accuri C6 flow cytometer (BD Biosciences).

### **T7E1 assay**

For the T7E1 assay, 100 ng Cas9 mRNA and 300 ng sgRNA were used. Genomic DNA was extracted before PCR. The target site was amplified by nested PCR using the appropriate primers (Supplementary Table S2). The first reaction condition was 94°C for 2 min, 20 cycles of 98°C for 10 sec, 60°C for 30 sec, and 68°C for 30 sec, and 72°C for 3 min and finally 4°C for  $\infty$ . The second reaction condition was 94°C for 2 min, 35 cycles of 98°C for 10 sec, 60°C for 30 sec, and

68°C for 15 sec, and 72°C for 3 min and 4°C for ∞. The PCR amplicon was purified by MinElute PCR purification Kit (QIAGEN). Then, denaturing and re-annealing reactions were conducted at 95°C for 5 min, 95°C to 85°C at -2.0°C/sec, 85°C to 25°C at -0.1°C/sec and finally 4°C for ∞). This fragment was then digested by T7 Endonuclease I. The resulting products were analyzed by electrophoresis in a 5% polyacrylamide gel and were visualized by staining with SYBR Green mixture (I+II =1:1).

Insertions and deletions (Indels) were determined by the formula,  $100 \times (1 - \sqrt{1 - (b + c)/(a + b + c)})$ , where **a** is the integrated intensity of the undigested PCR product, and **b** and **c** are the integrated intensities of each cleavage product.

### **Sequencing**

For phosphorylation of PCR amplicon (T7E1 second PCR product), primers (T7E1\_EGFP Fwd\_ORF and T7E1\_EGFP Rev\_Univ., sequences are shown in Supplementary Table S2) were phosphorylated by T4PNK (TAKARA) and ATP (Ambion). Amplicon was phosphorylated by PCR reaction using the phosphorylated primers and cloned in pUC19 vector at the SmaI site. The purified plasmids were sequenced by using M13 FwdNew primer, T7E1 Fwd primer or T7E1 Rev primer as the sequence primer. Sequencing was conducted by using Applied Biosystems 3500xL Genetic analyzer (Applied Biosystems).

### **Evaluation of gene expression level**

To collect total RNA, cells were treated with Trizol (ThermoFisher) following the manufacturer's protocol. To eliminate genomic DNA, samples were treated with TURBO DNase Inactivation Kit (Ambion) following the manufacturer's protocol. To measure the mRNA level, 250 or 300 ng of total RNA were reverse-transcribed by ReverTra Ace<sup>®</sup> qPCR RT Master Mix (TOYOBO) following the manufacturer's protocol. Quantitative PCR (qPCR) was performed using THUNDERBIRD<sup>®</sup> SYBR<sup>®</sup> qPCR Mix (TOYOBO) following the manufacturer's protocol, and the samples were analyzed using a StepOne Plus Real-Time PCR System (Applied Biosystems). Primers for qPCR are listed in Supplementary Table S3. Target mRNA was normalized to GAPDH and analyzed by the  $\Delta\Delta C_t$  method.

### **Cy5-labelling of sgRNA**

Cy5 labelled sgRNA were prepared by ligation using T4 RNA ligase (Ambion) and pCp-Cy5 (Jane Bioscience). Cy5 labelling was performed with 200 pmol purified sgRNA using 40 U T4 RNA ligase, 4 nmol pCp-Cy5 and 10% DMSO in 40  $\mu$ L at 16°C for 48 h. Cy5-labelled sgRNA was purified using an RNeasy MinElute Cleanup Kit (QIAGEN).

### **Evaluation of transfection efficiency**

To measure the relative transfection efficiency, 100 ng *BFP* mRNA and 300 ng Cy5-labeled sgRNA were transfected into HeLa-EGFP cells or iPS-EGFP cells. At 24 h after RNA transfection, cells were washed with PBS three times. These

cells were harvested as described in Cas9 activity assay and analyzed on a LSR flow cytometer.

### **Neuron differentiation assay**

Differentiated mDA-EGFP cells were derived from iPS-EGFP cells. Briefly, differentiation was started from a single cell suspension of iPS-EGFP cells in day 0 differentiation medium with ROCK inhibitor and seeded at  $5 \times 10^6$  cells/well in laminin-coated 6-well plates. The differentiating cells were cultured at 37°C with 5% CO<sub>2</sub>. At least 24 h later, the medium was changed to day 1 medium, and the medium was changed daily. For the assays, cells were passaged at day 14 in 24-well plates at a density of  $2.0 \times 10^5$  cells/well.

## Schematic of mDA neuron differentiation assay

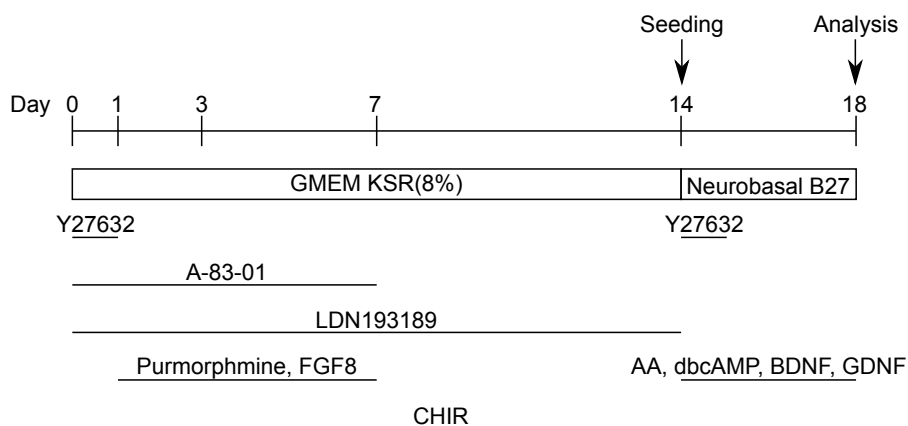

### 8GMK

|                                                        |
|--------------------------------------------------------|
| Glasgow's MEM (Thermo FisherScientific)                |
| 1X Non-essential amino acids (Thermo FisherScientific) |
| 8% knockout-serum (Thermo FisherScientific)            |
| 100 $\mu$ M sodium pyruvate (Thermo FisherScientific)  |
| 100 $\mu$ M $\beta$ -mercaptoethanol (Wako)            |

### Day 0

|                              |
|------------------------------|
| 8GMK                         |
| 10 $\mu$ M Y26732 (Wako)     |
| 100 nM LDN-193189 (Stemgent) |
| 500 nM A-83-01 (Wako)        |

### Day 1-2

|                                          |
|------------------------------------------|
| 8GMK                                     |
| 100 nM LDN-193189                        |
| 500 nM A-83-01                           |
| 2 $\mu$ M Purmorphamine (Calbiochen)     |
| 100 ng/mL Human recombinant FGF-8 (Wako) |

### Day 3-6

|                                   |
|-----------------------------------|
| 8GMK                              |
| 100 nM LDN-193189                 |
| 500 nM A-83-01                    |
| 2 $\mu$ M Purmorphamine           |
| 100 ng/mL Human recombinant FGF-8 |
| 30 $\mu$ M CHIR99021 (Stemgent)   |

### Day 7-13

|                      |
|----------------------|
| 8GMK                 |
| 100 nM LDN-193189    |
| 30 $\mu$ M CHIR99021 |

### Neurobasal B27

|                                             |
|---------------------------------------------|
| Neurobasal medium (Thermo FisherScientific) |
| 2% B27 supplement (Thermo FisherScientific) |
| 2 mM L-glutamine                            |

### Day 14

|                                            |
|--------------------------------------------|
| Neurobasal B27                             |
| 10 $\mu$ M Y26732                          |
| 200 $\mu$ M Abscorbic acid (Sigma Aldrich) |
| 400 $\mu$ M dbcAMP (Sigma Aldrich)         |
| 20 ng/mL Human recombinant BDNF (R&D)      |
| 10 ng/mL Human recombinant GDNF (R&D)      |

### Day 15-

|                                            |
|--------------------------------------------|
| Neurobasal B27                             |
| 200 $\mu$ M Abscorbic acid (Sigma Aldrich) |
| 400 $\mu$ M dbcAMP (Sigma Aldrich)         |
| 20 ng/mL Human recombinant BDNF (R&D)      |
| 10 ng/mL Human recombinant GDNF (R&D)      |



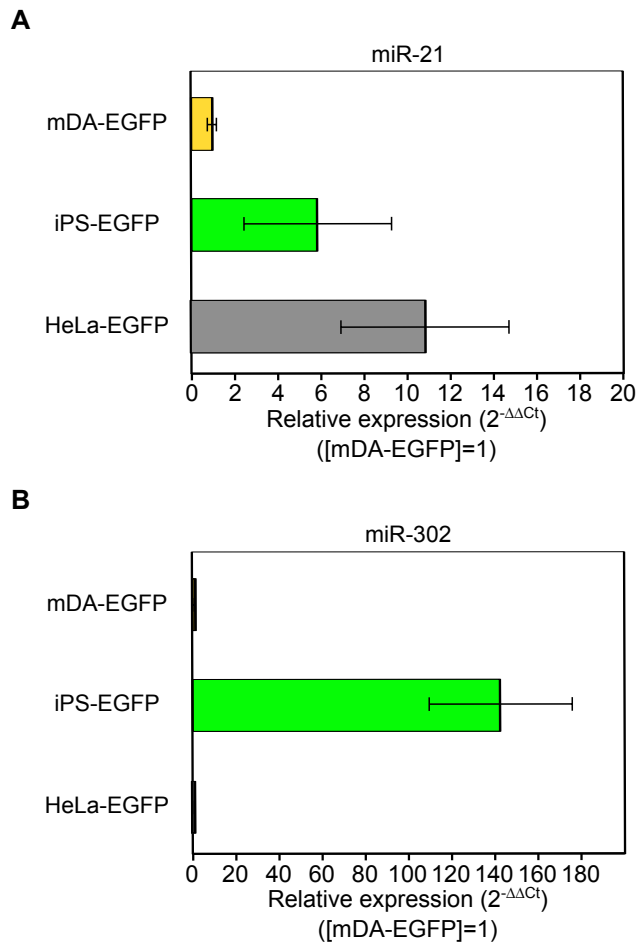

**Supplementary Figure S1. Analysis of endogenous miRNA expression by qPCR. (A)** Representative bar graph of miR-21 expression in HeLa cells, iPS cells and mDA neurons (Day 14). **(B)** Representative bar graph of miR-302 expression levels in HeLa cells, iPS cells and mDA neurons (Day 14). Each miRNA expression was normalized with RNU6B expression ( $2^{-\Delta\Delta C_t}$ ) and then each normalized miRNA expression ( $2^{-\Delta\Delta C_t}$ ) was normalized again with mDA neurons (*i.e.*,  $2^{-\Delta\Delta C_t}_{\text{mDA neurons}} = 1$ ). Error bars indicate the mean  $\pm$  SD ( $n = 3$ ).

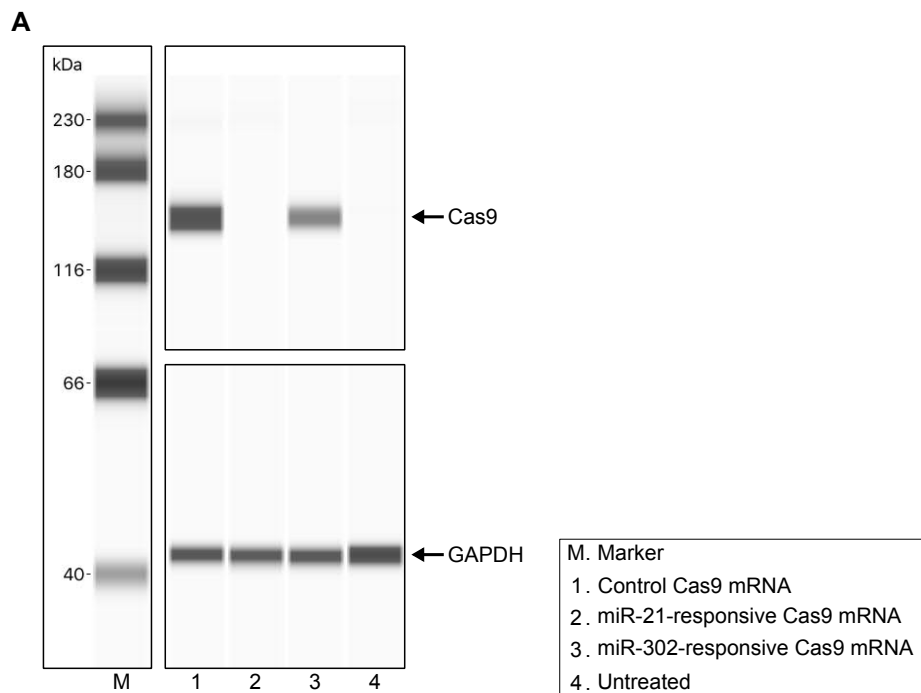

**Supplementary Figure S2. Cas9 protein expression levels in HeLa cells.** Representative virtual blot of Simple Western analysis at 24 h after RNA transfection. Cas9 protein expression levels were detected by virtual blot-like images of the capillary electrophoresis. GAPDH was used as a loading control. Lanes: M, molecular weight marker; 1, control *Cas9* mRNA; 2, miR-21-responsive *Cas9* mRNA; 3, miR-302-responsive *Cas9* mRNA; 4, untreated cells. The experiment was repeated three times. A representative image is shown.

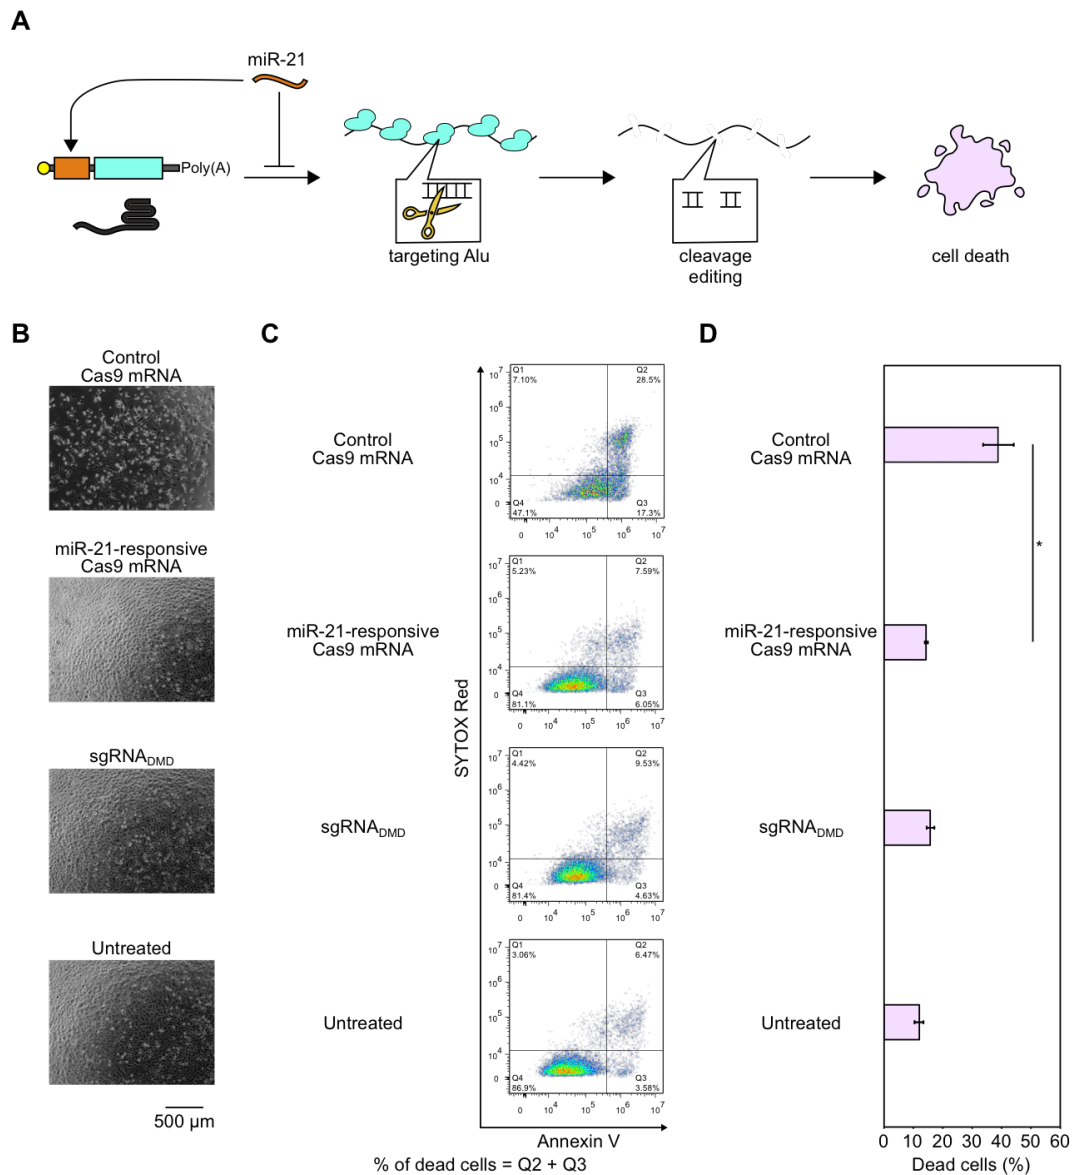

**Supplementary Figure S3. miR-Cas9 switch targeting Alu.** (A) Schematic illustration of the system targeting Alu. The Cas9-sgRNA complex targeting a common Alu sequence cleaves genomic DNA at multiple locations and induces cell death. (B) Representative microscopic images at 48 h after RNA transfection. The scale bar represents 500  $\mu\text{m}$ . (C) Representative dot plots of the cells at 48 h after RNA transfection. Positive populations of Annexin V (x-axis) and SYTOX Red (y-axis) indicate dead cells. Representative images are shown from three independent experiments. (D) Dead cells were calculated by counting Q2 + Q3 cells shown in (C). Negative control targets the *DMD* gene. Error bars indicate the mean  $\pm$  SD ( $n = 3$ ).

**A**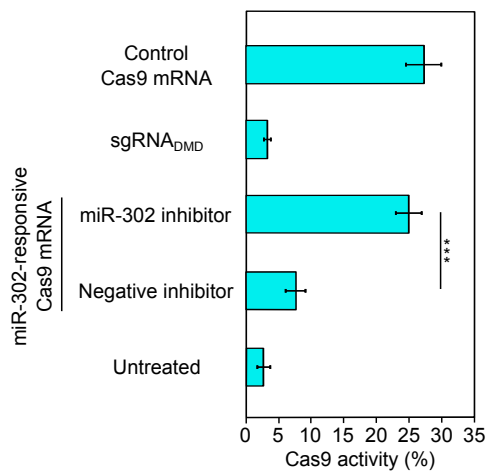**B**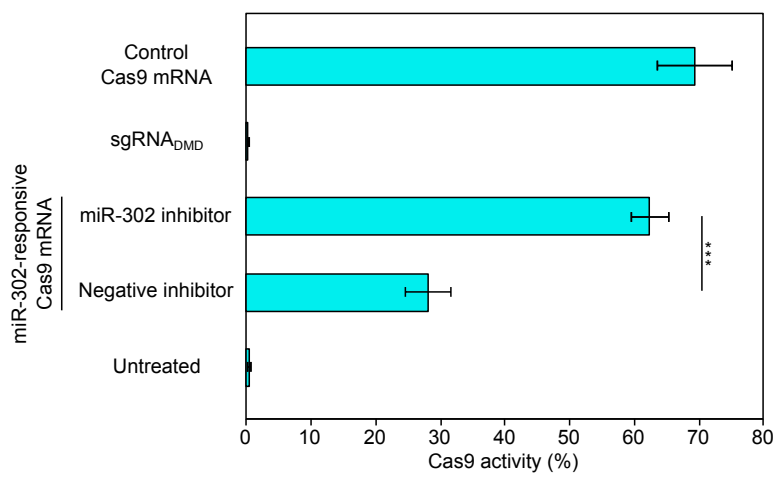**C**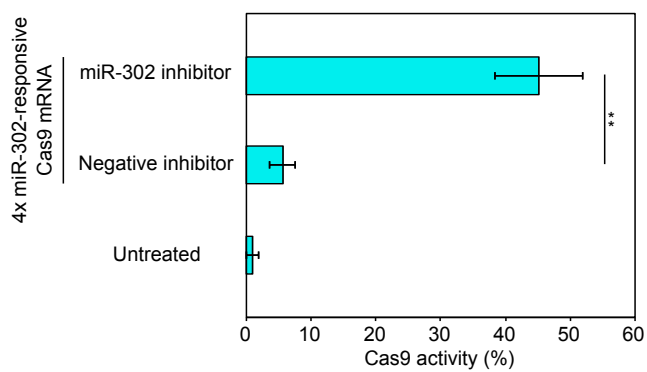

**Supplementary Figure S4. Improvement of Cas9 activity in hiPSCs by engineering sgRNA and miR-302-Cas9 switch.** (A) First evaluation of miR-302-responsive *Cas9* mRNA in hiPSCs. A miR-302 inhibitor rescued *Cas9* activity expressed from miR-302-responsive *Cas9* mRNA, whereas a negative miRNA inhibitor did not. However, the *Cas9* activity was low (25 - 30%, Control *Cas9* mRNA). (B) Improvement of *Cas9* activity by changing sgRNA (removal of GG from 5' terminal, sgRNA<sub>2GFP</sub>) in hiPS-EGFP cells. In comparison with data using the original sgRNA (sgRNA<sub>GFP</sub>) shown in (A), *Cas9* activity increased about 40-50%, though leaky expression of *Cas9* was observed (Negative inhibitor). (C) Optimization of 4x miR-302-responsive *Cas9* mRNA and sgRNA<sub>2GFP</sub>. Final condition was 50 ng 4x miR-302-responsive *Cas9* mRNA and 300 ng sgRNA<sub>2GFP</sub>. High *Cas9* activity (45%, miR-302 inhibitor) and reduced leaky expression (8%, Negative inhibitor) were observed. Error bars indicate the mean  $\pm$  SD (n = 3).

**A**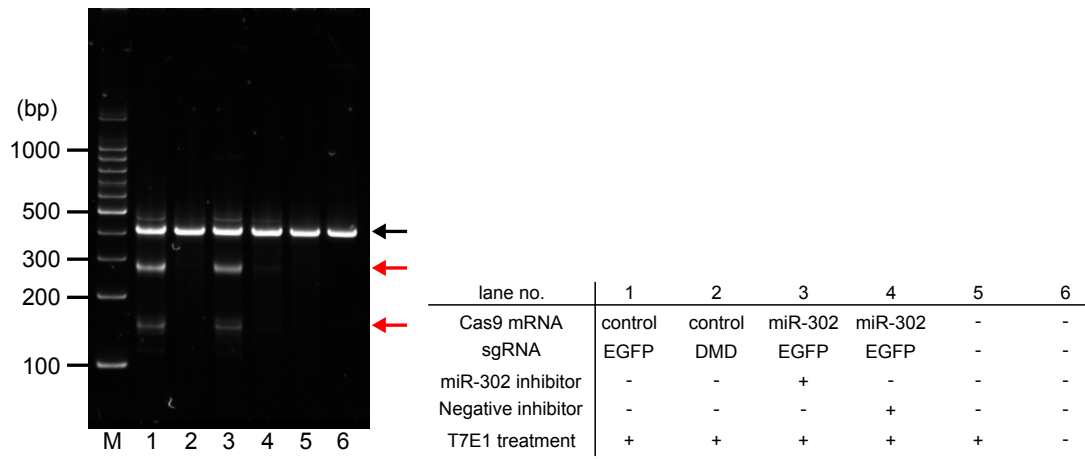**B**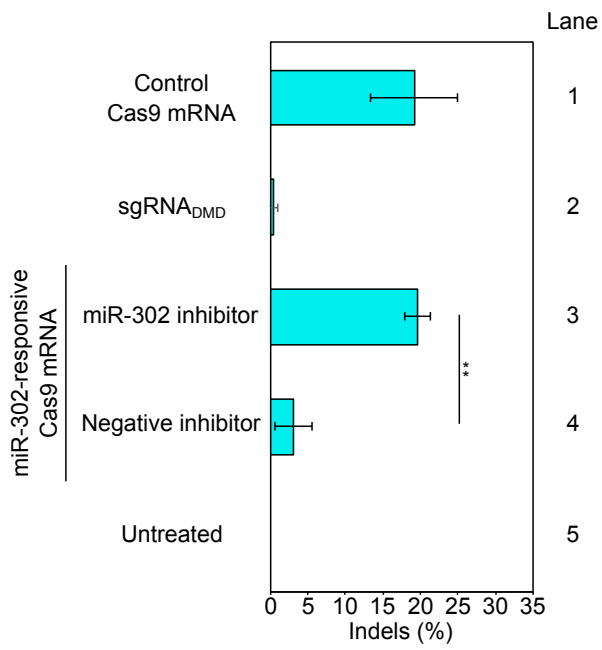

**Supplementary Figure S5. T7E1 assay for hiPSCs with miR-302-Cas9 switch.**

**(A)** Representative gel image of T7E1 assay. Top band (black arrow, 436 bp) indicates the target amplicon. The lower two bands (red arrows, 286 bp and 150 bp) indicate digested fragments by T7 endonuclease I. Lanes: M, molecular weight marker (100-bp ladder); 1, control *Cas9* mRNA; 2, negative control (targeting DMD); 3, miR-302-responsive *Cas9* mRNA + miR-302 inhibitor; 4, miR-302-responsive *Cas9* mRNA + negative miRNA inhibitor; 5, untreated cells with T7 endonuclease I; and 6, untreated cells without T7 endonuclease I. The samples are summarized in the table to the right. **(B)** Quantification of *Cas9* activity (indels) from **(A)**. No digestion products were detected in the untreated sample. Error bars indicate the mean  $\pm$  SD ( $n = 3$ ).

**A**

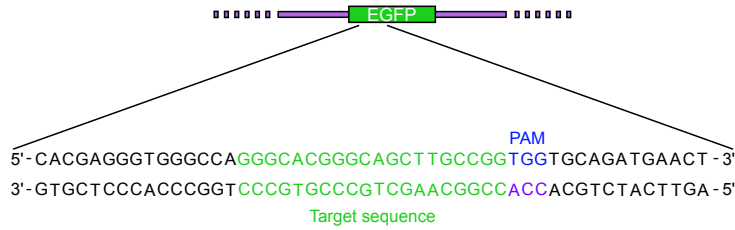

**B**

Control Cas9 mRNA

5' - AGTTCATCTGCACCA<sup>CCG</sup> GCAAGCTGCCCGTGCCCTGGCCACCCCTCGTG - 3' WT 15/18  
5' - AGTTCATC - - C - - - - - GCAAGCTGCCCGTGCCCTGGCCACCCCTCGTG - 3' Δ9 1/18  
5' - AGTTCATCTGCACCA<sup>CCG</sup>TGCAGATGACCTGAAGTTCATCTGCAAGCTGCCCGTGCCCTGGCCACCCCTCGTG - 3' +23 1/18  
5' - AGTTCATCTGCACCA<sup>CCG</sup>TGCCCTGGCCACCCCTC GCAAGCTGCCCGTGCCCTGGCCACCCCTCGTG - 3' +17 1/18

miR-302-responsive Cas9 mRNA + miR-302 inhibitor

5' - AGTTCATCTGCACCA<sup>CCG</sup> CAAGCTGCCCGTGCCCTGGCCACCCCTCGTG - 3' WT 16/18  
5' - AGTTCATCTGCACCA<sup>CCG</sup>GCAAGCTGCCCGTGCCCTGGCCACCCCTCGTG - 3' +1 1/18  
5' - AGTTCATCTGCACCA<sup>CC</sup>-G CAAGCTGCCCGTGCCCTGGCCACCCCTCGTG - 3' Δ1 1/18

miR-302-responsive Cas9 mRNA + Negative inhibitor

5' - AGTTCATCTGCACCA<sup>CCG</sup>GCAAGCTGCCCGTGCCCTGGCCACCCCTCGTG - 3' WT 19/19

sgRNA<sub>DMD</sub>

5' - AGTTCATCTGCACCA<sup>CCG</sup>GCAAGCTGCCCGTGCCCTGGCCACCCCTCGTG - 3' WT 10/10

Untreated

5' - AGTTCATCTGCACCA<sup>CCG</sup>GCAAGCTGCCCGTGCCCTGGCCACCCCTCGTG - 3' WT 9/9

## Supplementary Figure S6. Confirmation of DNA sequencing in T7E1 assays.

(A) Illustration of the target sequence. Target sequence is green letters. Protospacer adjacent motif (PAM) sequence and complimentary PAM sequence are written as blue and purple letters, respectively. (B) Observed sequences in Supplementary Figure S5. Red letters and dashes indicate the identified mutations. The sgRNA targeting sequence and complimentary PAM sequence are written as green and purple letters, respectively. The size of the insertions and deletions are shown to the right of each mutated sequence (+, insertions; Δ, deletions). Numbers on the right indicate the numbers of mutated clones and all analyzed clones. Each sequence was read by forward and reverse primers.



**A**

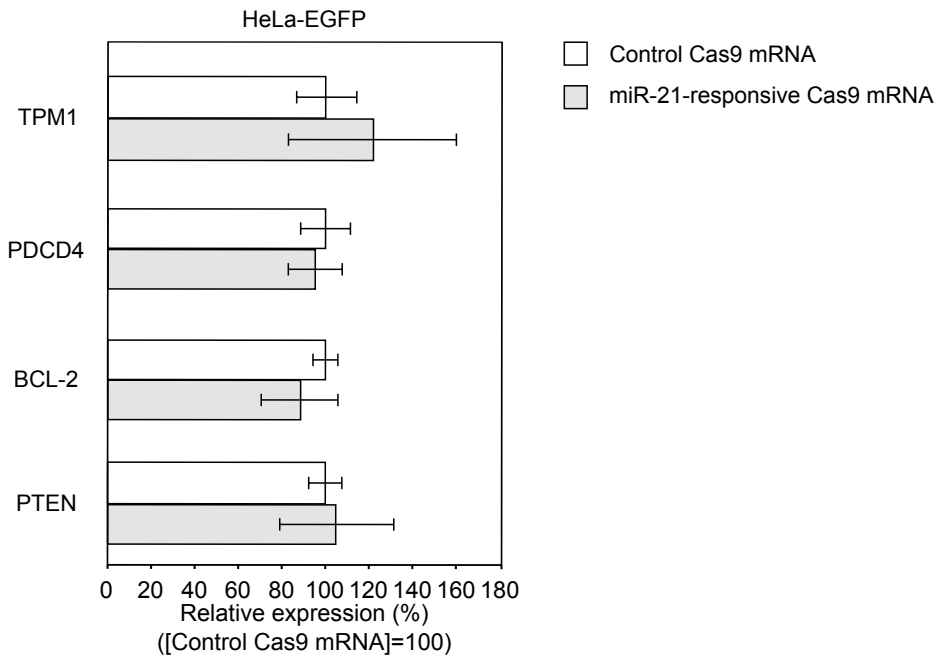

**B**

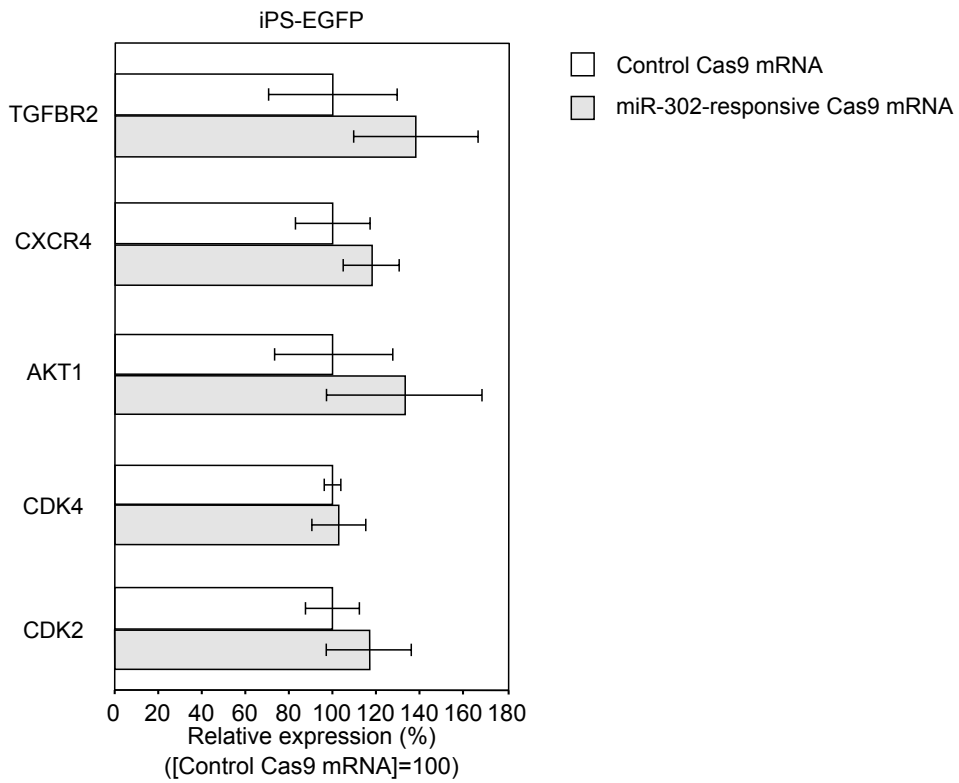

**Supplementary Figure S7. Effect of miRNA-responsive Cas9 mRNA on endogenous gene expression in HeLa and iPS cells.** (A) The effect of miR-21-responsive Cas9 mRNA in HeLa cells was evaluated by qPCR. (B) The effect of miR-302-responsive Cas9 mRNA in iPS cells was evaluated by qPCR. Target mRNA levels were normalized with *GAPDH* mRNA (target gene expression) and then each target gene expression was normalized with each control Cas9 mRNAs. Error bars indicate the mean  $\pm$  SD (n = 6).

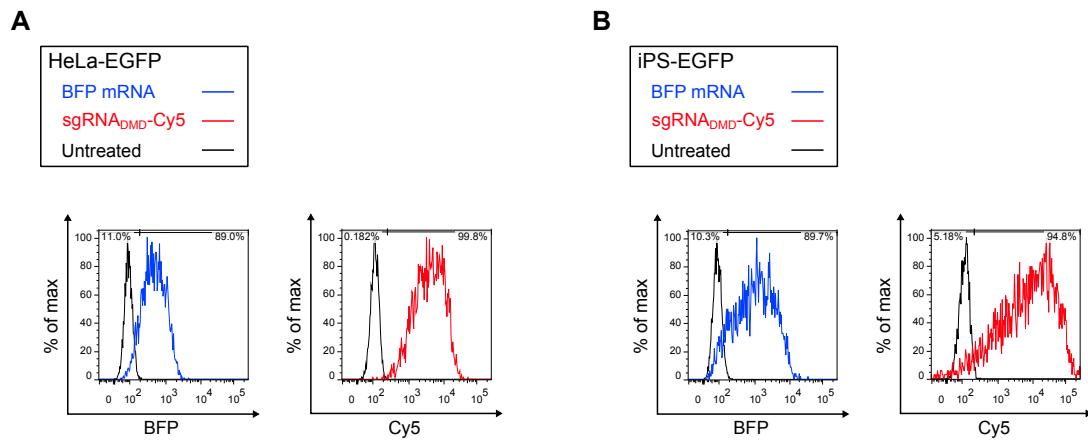

**Supplementary Figure S8. Relative transfection efficiencies in HeLa and iPS cells.** (A) Relative transfection efficiencies in HeLa cells. Representative flow cytometry histograms of *BFP* mRNA (blue) and Cy5-labeled sgRNA (red). (B) Relative transfection efficiencies in iPS cells. Representative flow cytometry histograms of *BFP* mRNA (blue) and Cy5-labeled sgRNA (red). x- and y-axes indicate BFP or Cy5 intensity and % of max, respectively. These experiments were repeated three times.

**A**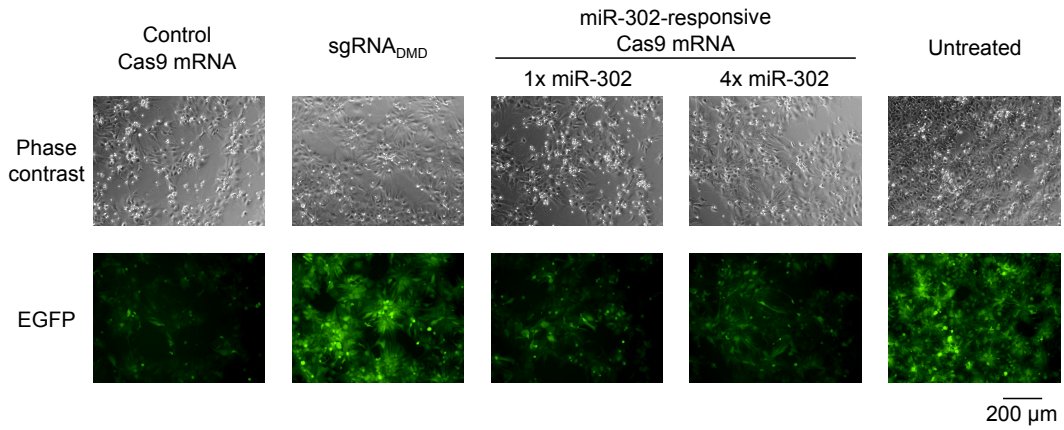**B**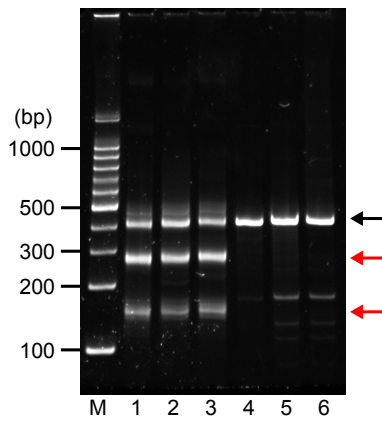**C**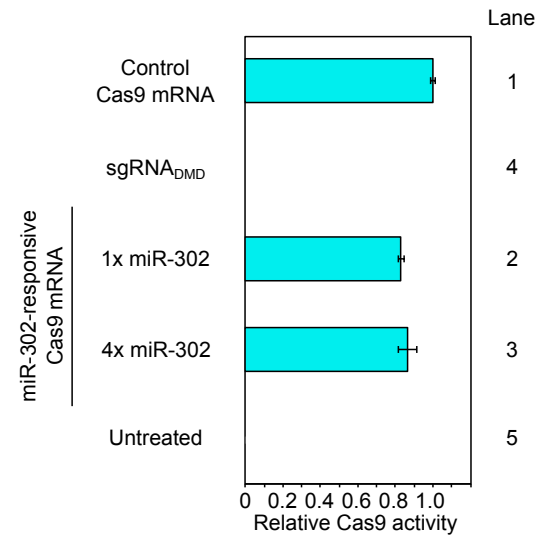

| lane no.       | 1       | 2          | 3          | 4       | 5 | 6 |
|----------------|---------|------------|------------|---------|---|---|
| Cas9 mRNA      | control | 1x miR-302 | 4x miR-302 | control | - | - |
| sgRNA          | EGFP    | EGFP       | EGFP       | DMD     | - | - |
| T7E1 treatment | +       | +          | +          | +       | + | - |

**Supplementary Figure S9. miR-302-Cas9 switch in mDA neuron. (A)** Representative fluorescent microscopic images at 72 h after RNA transfection. Phase contrast and EGFP indicate phase contrast and EGFP fluorescent images, respectively. Scale bar represents 200  $\mu$ m. **(B)** Representative gel image from a T7E1 assay using mDA-EGFP cells derived from hiPS-EGFP cells. Top band (black arrow, 436 bp) indicates the target amplicon. The below two bands (red arrows, 286 bp and 150 bp) indicate digested fragments by T7 endonuclease I. Lanes: M, molecular weight marker (100-bp ladder); 1, control *Cas9* mRNA; 2, miR-302-responsive *Cas9* mRNA; 3, 4x miR-302-responsive *Cas9* mRNA; 4, negative control (targeting DMD); 5, untreated cells with T7 endonuclease I; and 6, untreated cells without T7 endonuclease I. The samples are summarized in the table below. **(C)** Quantification of relative *Cas9* activity from **(B)**. Each *Cas9* activity was normalized by control *Cas9* mRNA (lane no.1). Error bars indicate the mean  $\pm$  SD (n = 3).

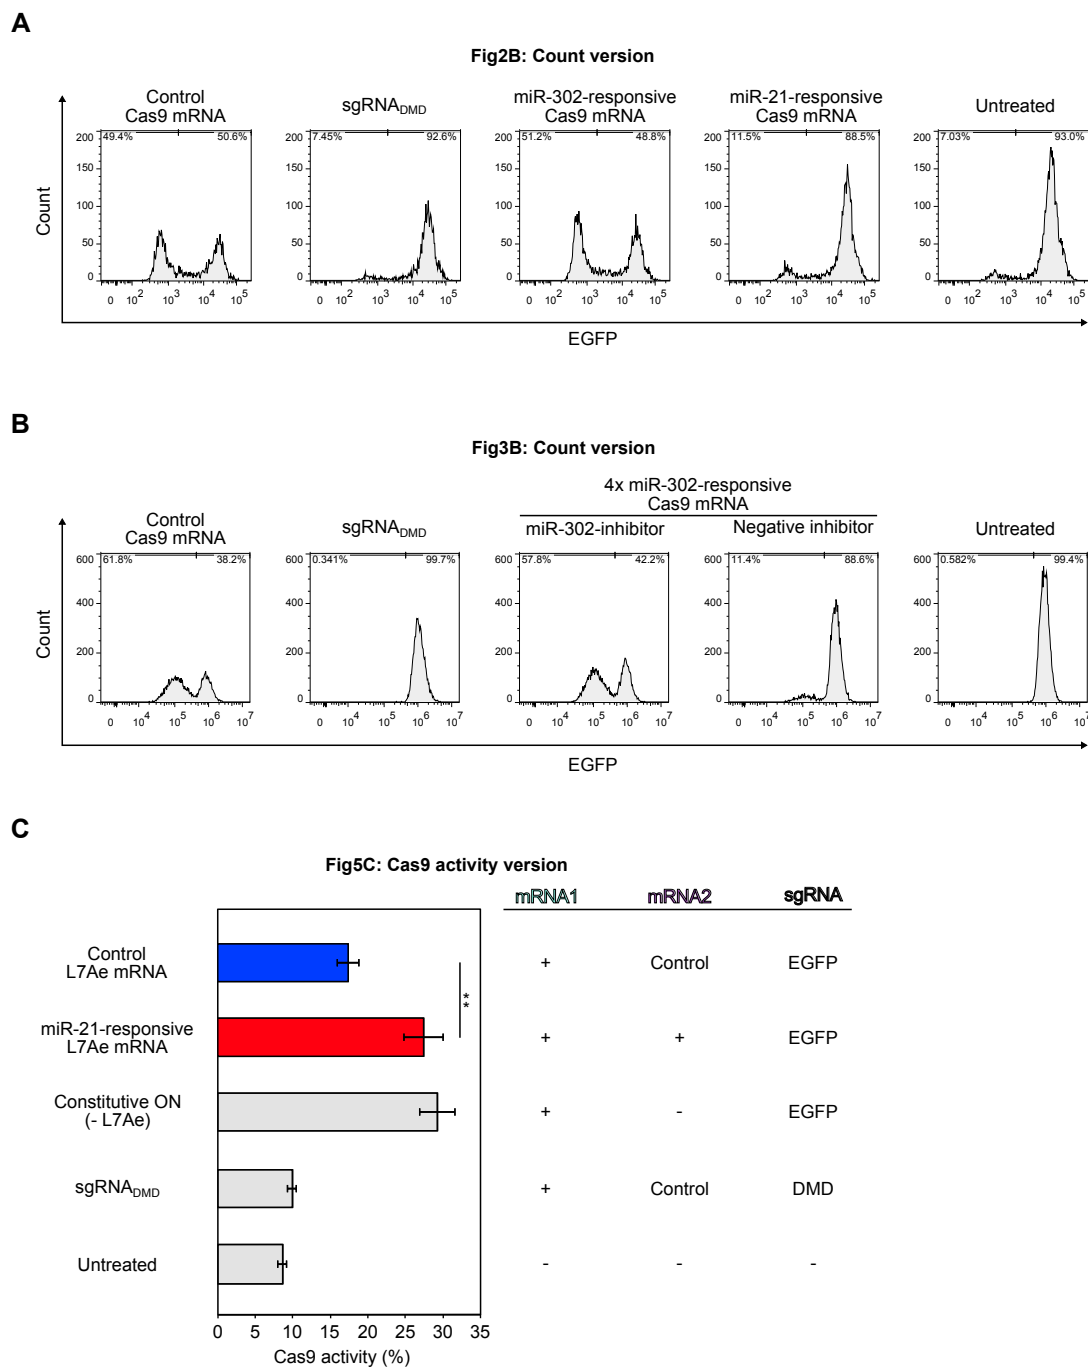

**Supplementary Figure S10. Unnormalized raw data. (A) and (B)** Cell counts from Figure 2B and 3B. x- and y-axes indicate EGFP intensity and cell number, respectively. **(C)** Quantification of Cas9 activity from Figure 5B.

### Supplementary Table S1: Primers and oligo DNAs for RNAs

1. miRNA target sites and RNA motifs are written as orange and red letters, respectively.
2. sgRNA target sequences are written as green letters.
3. All primers were designed manually.

| Primer/Oligo DNA name   | Sequence (5' -> 3')                                                                                   |
|-------------------------|-------------------------------------------------------------------------------------------------------|
| TAP_T7_G3C fwd primer   | CAGTGAATTGTAATACGACTCACTATAGGGC                                                                       |
| IVT_5prime_UTR primer   | CAGTGAATTGTAATACGACTCACTATAGGGCGAATTAAGAGAG<br>AAAAGAAGAGTAAGAAGAAATATAAGACACCGGTCGCCACCAT<br>G       |
| Rev5UTR primer          | CATGGTGGCGACCGGTGTCTTATATTTCTTCTTACTC                                                                 |
| SphcCas9 ORF fwd primer | CACCGGTCGCCACCATGGATAAGAAATACAGCATTGGAC                                                               |
| SphcCas9 ORF rev primer | GCCCCGCAGAAGGTCTAGACTATCACACCTTCTTCTTCTT<br>GG                                                        |
| L7Ae_IVTfwd             | CACCGGTCGCCACCATGTACGTGAGATTTGAGGTTCTCTG                                                              |
| Tag BFP Fwd             | CACCGGTCGCCACCATGGGATCCAGCGAG                                                                         |
| TAP_IVTrev              | GCCCCGCAGAAGGTCTAGACTATCACTCGAGATGCATATGAGA<br>TC                                                     |
| IVT_3prime_UTR primer   | TCTAGACCTTCTGCGGGGCTTGCCCTTCTGGCCATGCCCTTCTT<br>CTCTCCCTTGCACCTGTACCTCTTGGTCTTTGAATAAAGCCTGA<br>GTAGG |
| Fwd3UTR primer          | TCTAGACCTTCTGCGGGGC                                                                                   |
| Rev3UTR2T20             | TTTTTTTTTTTTTTTTTTTTTCTACTCAGGCTTATTCAAAGACCA<br>AG                                                   |
| GCT7pro_5UTR2           | GCTAATACGACTCACTATAGGTTCTTAATCGCGGATCC                                                                |
| 5UTRtemp_T302a-5p       | CGACTCACTATAGGTTCCGCGATCGCGGATCCAGCAAGTACAT<br>CCACGTTAAGTAGATCCACCGGTCGCCACCATG                      |
| 5UTRtemp_T21-5p         | CGACTCACTATAGGTTCCGCGATCGCGGATCCCAACATCAGT<br>CTGATAAGCTAAGATCACACCGGTCGCCACCATG                      |

| Primer/Oligo DNA name          | Sequence (5' -> 3')                                                                                                                                                         |
|--------------------------------|-----------------------------------------------------------------------------------------------------------------------------------------------------------------------------|
| 5UTRtemp_4x302a-5p             | CGACTCACTATAGGTTCCGCGATCGCGGATCCAGCAAGTACAT<br>CCACGTTTAAGTAGCAAGTACATCCACGTTTAAGTAGCAAGTAC<br>ATCCACGTTTAAGTAGCAAGTACATCCACGTTTAAGTAGATCAC<br>ACCGGTCGCCACCATG             |
| CGCT7G2                        | CGCTAATACGACTCACTATAGG                                                                                                                                                      |
| 5UTR4ntmoxCDr0sp               | CGCTAATACGACTCACTATAGGATCCGTGATCGGAAACGTGAG<br>ATCCACCTCAGATCCGCTAGGACACCCGCAGATCGAG                                                                                        |
| Spacer5UTRFwd                  | ACACCCGCAGATCGAGAAGAAGGCGAATTAAGAGAGAAAAGA<br>AGAGTAAGAAGAAATATAAGACACCGGTCGCCACCATG                                                                                        |
| 3UTR120A                       | TTTTTTTTTTTTTTTTTTTTTTTTTTTTTTTTTTTTTTTTTTTTTTTTTTTTTTTTTTTT<br>TTTTTTTTTTTTTTTTTTTTTTTTTTTTTTTTTTTTTTTTTTTTTTTTTTTTTTTTTTTT<br>TTTTTTTTTTTTTTTTTTTTTTTTTCTACTCAGGCTTTATTCA |
| T7-sgRNA fwd primer (DMD)      | GAAATTAATACGACTCACTATAGGTATCTTACAGGAACTCCGTT<br>TTAGAGCTAGAAATAGCAAG                                                                                                        |
| T7-sgRNA fwd primer (EGFP)     | GAAATTAATACGACTCACTATAGGGGGCACGGGCAGCTTGCC<br>GGGTTTTAGAGCTAGAAATAGCAAG                                                                                                     |
| T7-sgRNA fwd primer (EGFP ΔGG) | GAAATTAATACGACTCACTATAGGGCACGGGCAGCTTGCCGG<br>GTTTTAGAGCTAGAAATAGCAAG                                                                                                       |
| T7-sgRNA fwd primer (Alu1)     | GAAATTAATACGACTCACTATAGGGCCTGTAATCCCAGCACTTT<br>GTTTTAGAGCTAGAAATAGCAAG                                                                                                     |
| sgRNA+85 rev primer            | AAAGCACCGACTCGGTGCCACTTTTTCAAGTTGATAACGGACT<br>AGCCTTATTTAACTTGCTATTTCTAGCTCTAAAAC                                                                                          |



### Supplementary Table S2: Primers for T7E1 assay

1. T7E1\_EGFP Fwd\_L and T7E1\_EGFP Rev\_univ. were designed using Primer3Plus\*.
2. Other primers were designed manually.

| Primer/Oligo DNA name | Sequence (5' -> 3')         |
|-----------------------|-----------------------------|
| T7E1_EGFP Fwd_L       | CAGCCATTGCCTTTTATGG         |
| T7E1_EGFP Rev_Univ.2  | GTGTTCTGCTGGTAGTGGTCGGCGAG  |
| T7E1_EGFP Fwd_ORF     | TGAGCAAGGGCGAGGAGCTGTTCAC   |
| T7E1_EGFP Rev_Univ.   | TTGTAGTTGTACTIONCCAGCTTGTGC |
| M13 FwdNew primer     | GTTTTCCCAGTCACGAC           |

\*Primer3Plus: <http://www.bioinformatics.nl/cgi-bin/primer3plus/primer3plus.cgi>

### Supplementary Table S3: qPCR primers used in this study

1. Primers were designed according to the given reference (except for CXCR4 Fwd & PDCD4 Rev).
2. CXCR4 Fwd was redesigned using Primer3Plus\* to minimize amplicon size.
3. PDCD4 Rev's 3' terminal base was replaced (C to G).

| Target gene |     | Sequence (5' -> 3')              | Length (nt) | Tm (°C) | GC% | Amplicon (bp) | Ref. |
|-------------|-----|----------------------------------|-------------|---------|-----|---------------|------|
| PTEN        | Fwd | CAAGATGATGTTTGAAACT<br>ATTCCAATG | 28          | 55      | 32  | 77            | (2)  |
|             | Rev | CCTTTAGCTGGCAGACCA<br>CAA        | 21          | 59      | 52  |               |      |
| BCL2        | Fwd | TCCGCATCAGGAAGGCTA<br>GA         | 20          | 59      | 55  | 113           | (3)  |
|             | Rev | AGGACCAGGCCTCCAAGC<br>T          | 19          | 62      | 63  |               |      |
| PDCD4       | Fwd | TATGATGTGGAGGAGGTG<br>GATGTGA    | 25          | 61      | 48  | 96            | (4)  |
|             | Rev | CCTTTCATCCAAAGGCAA<br>AACTACAG   | 26          | 58      | 42  |               |      |
| TPM1        | Fwd | GCCGACGTAGCTTCTCTG<br>AAC        | 21          | 59      | 57  | 160           | (5)  |
|             | Rev | TTTGGGCTCGACTCTCAA<br>TGA        | 21          | 58      | 48  |               |      |
| CDK2        | Fwd | GCTAGCAGACTTTGGACT<br>AGCCAG     | 24          | 61      | 54  | 85            | (3)  |
|             | Rev | AGCTCGGTACCACAGGGT<br>CA         | 20          | 61      | 60  |               |      |
| CDK4        | Fwd | CTGGTGTTTGAGCATGTA<br>GACC       | 22          | 57      | 50  | 102           | (3)  |
|             | Rev | AAACTGGCGCATCAGATC<br>CTT        | 21          | 59      | 48  |               |      |

| Target gene |     | Sequence (5' -> 3')         | Length (nt) | Tm (°C) | GC% | Amplicon (bp) | Ref. |
|-------------|-----|-----------------------------|-------------|---------|-----|---------------|------|
| AKT1        | Fwd | GCACAAACGAGGGGAGTA<br>CAT   | 21          | 58      | 52  | 113           | (3)  |
|             | Rev | CCTCACGTTGGTCCACATC         | 19          | 56      | 58  |               |      |
| CXCR4       | Fwd | TCATCCTGGCCTTCATCAG<br>T    | 20          | 57      | 50  | 112           | (6)  |
|             | Rev | ATCCAGACGCCAACATAG<br>AC    | 20          | 55      | 50  |               |      |
| TGFB2       | Fwd | GTAGCTCTGATGAGTGCA<br>ATGAC | 23          | 57      | 48  | 132           | (7)  |
|             | Rev | CAGATATGGCAACTCCCA<br>GTG   | 21          | 56      | 52  |               |      |

\*Primer3Plus: <http://www.bioinformatics.nl/cgi-bin/primer3plus/primer3plus.cgi>

## Supplementary Table S4: List of PCR reactions

| No. | Name                                     | Type                          | Templates                                  | Forward primer                 | Reverse primer          | Additional oligos |
|-----|------------------------------------------|-------------------------------|--------------------------------------------|--------------------------------|-------------------------|-------------------|
| 1   | 5'-UTR (control)                         | UTR                           | IVT_5prime_UTR primer                      | TAP_T7_G3C fwd primer          | Rev5UTR primer          |                   |
| 2   | 3'-UTR                                   | UTR                           | IVT_3prime_UTR primer                      | Fwd3UTR primer                 | Rev3UTR2T20             |                   |
| 3   | ORF PCR (Cas9)                           | ORF                           | pHL-EF1a-SphcCas9-iC-A                     | SphcCas9 ORF fwd primer        | SphcCas9 ORF rev primer |                   |
| 4   | ORF PCR (L7Ae)                           | ORF                           | pAM_L7Ae                                   | L7Ae_IVTfwd                    | TAP_IVTrev              |                   |
| 5   | ORF PCR (BFP)                            | ORF                           | pA9-tagBFP                                 | Tag BFP Fwd                    | TAP_IVTrev              |                   |
| 6   | Control Cas9 mRNA Template               | IVT template                  | ORF PCR (Cas9), 5'-UTR (control), 3'-UTR   | TAP_T7_G3C fwd primer          | 3UTR120A                |                   |
| 7   | miR-21-responsive Cas9 mRNA Template     | IVT template                  | ORF PCR (Cas9), 5UTRtemp_T21-5p, 3'-UTR    | GCT7pro_5UTR2                  | 3UTR120A                |                   |
| 8   | miR-302-responsive Cas9 mRNA Template    | IVT template                  | ORF PCR (Cas9), 5UTRtemp_T302a-5p, 3'-UTR  | GCT7pro_5UTR2                  | 3UTR120A                |                   |
| 9   | 4x miR-302-responsive Cas9 mRNA Template | IVT template                  | ORF PCR (Cas9), 5UTRtemp_4x302a-5p, 3'-UTR | GCT7pro_5UTR2                  | 3UTR120A                |                   |
| 10  | Kl-Cas9 mRNA Template                    | IVT template                  | ORF PCR (Cas9), 5UTR4ntmoxCDr0sp, 3'-UTR   | CGCT7G2                        | 3UTR120A                | Spacer5UTRfwd     |
| 11  | Control L7Ae mRNA Template               | IVT template                  | ORF PCR (L7Ae), 5'-UTR (control), 3'-UTR   | TAP_T7_G3C fwd primer          | 3UTR120A                |                   |
| 12  | miR-21-responsive L7Ae mRNA Template     | IVT template                  | ORF PCR (L7Ae), 5UTRtemp_T21-5p, 3'-UTR    | GCT7pro_5UTR2                  | 3UTR120A                |                   |
| 13  | BFP mRNA Template                        | IVT template                  | ORF PCR (BFP), 5'-UTR (control), 3'-UTR    | TAP_T7_G3C fwd primer          | 3UTR120A                |                   |
| 14  | sgRNA <sub>DMD</sub> Template            | IVT template                  |                                            | T7-sgRNA fwd primer (DMD)      | sgRNA+85 rev primer     |                   |
| 15  | sgRNA <sub>GFP</sub> Template            | IVT template                  |                                            | T7-sgRNA fwd primer (EGFP)     | sgRNA+85 rev primer     |                   |
| 16  | sgRNA <sub>2GFP</sub> Template           | IVT template                  |                                            | T7-sgRNA fwd primer (EGFP ΔGG) | sgRNA+85 rev primer     |                   |
| 17  | sgRNA <sub>Alu1</sub> Template           | IVT template                  |                                            | T7-sgRNA fwd primer (Alu1)     | sgRNA+85 rev primer     |                   |
| 18  | T7E1 assay First PCR product             | T7E1 PCR template             | Genomic DNA                                | T7E1_EGFP Fwd_L                | T7E1_EGFP Rev_Univ.2    |                   |
| 19  | T7E1 assay Second PCR product            | For T7E1 assay and sequencing | T7E1 assay First PCR product               | T7E1_EGFP Fwd_ORF              | T7E1_EGFP Rev_Univ.     |                   |

### Supplementary Table S5: RNA sequences used in this study

1. The 5' terminus of the mRNA is capped with ARCA.
2. The protein coding regions are shown as bold letters.
3. The start and stop codons are underlined.
4. miRNA target sites and RNA motifs are written as orange and red letters, respectively.
5. sgRNA target sequences are written as green letters.

#### Control Cas9 mRNA

GGGCGAAUUAAGAGAGAAAAGAAGAGUAAGAAGAAUUAAGACACCGGUCGCCACCAU  
GGAUAAGAAUACAGCAUUGGACUGGACAUUGGGACAAACUCCGUGGGAUGGGCCGU  
**GAUUACAGACGAAUACAAAGUGCCUUCAAGAAGUUAAGGUGCUGGGCAACACCGA**  
**UAGACACAGCAUCAAGAAAAUCUGAUUGGAGCCCUGCUGUUCGACUCCGGCGAGAC**  
**AGCUGAAGCAACUCGGCUGAAAAGAACUGCUCGGAGAAGGUUAUACCCGCCGAAAGAA**  
**UAGGAUCUGCUACCUGCAGGAGAUUUUCAGCAACGAAAUGGCCAAGGUGGACGAUAG**  
**UUUCUUUCACCGCCUGGAGGAAUCAUUCUGGUCGAGGAAGAUAAAGAACACGAGCG**  
**GCAUCCCAUCUUUGGCAACAUUGUGGACGAGGUCGCUUAUCACGAAAAGUACCCUAC**  
**CAUCUAUCAUCUGAGGAAGAAACUGGUGGACUCCACAGAUAAAGCAGACCUGCGCCU**  
**GAUCUAUCUGGCCUUGGCUCACAUGAUUAAGUUCGGGGCCAUUUUCUGAUCGAGGG**  
**GGAUCUGAACCCAGACAAUUCUGAUGUGGACAAGCUGUUAUCCAGCUGGUCCAGAC**  
**AUACAAUCAGCUGUUUGAGGAAAACCCCAUUAUGCAUCUGGCGUGGACGAAAAGC**  
**CAUCCUGAGUGCCAGACUGUCUAAGAGUCGGAGACUGGAGAACCUGAUCGCUCAGCU**  
**GCCAGGGGAAAAGAAAACGGCCUGUUUGGAAUCUGAUUGCACUGUCACUGGGACU**  
**GACUCCCAACUUAAGAGCAAUUUUGAUCUGGCCGAGGACGCUAAACUGCAGCUGUC**  
**CAAGGACACCUAUGACGAUGACCUGGAUAACCUGCUGGCUCAGAUCGGGGAUCAGUA**  
**CGCAGACCUGUUCUGGCCGCUAAGAAUCUGUCUGACGCCAUCCUGCUGAGUGAUAU**  
**UCUGCGCGUGAACACCGAGAUUACAAAAGCCCCCUGUCAGCUAGCAUGAUCAAGAG**  
**AUAUGACGAGCACCAUCAGGAUCUGACCUGCUGAAGGCUCUGGUGAGGCAGCAGCU**  
**GCCUGAGAAGUACAAGGAAUCUUCUUUGAUCAGUCUAAGAACGGAUACGCCGGCUA**  
**UAUUGACGGCGGGGCUAGUCAGGAGGAGUUCUACAAGUUUAUCAACCCAUUCUGGA**  
**GAAGAUGGAUGGCACAGAGGAACUGCUGGUGAAACUGAAUCGGGAAGACCUGCUGAG**  
**GAAGCAGCGCACUUUUGAUAAACGGAAGCAUCCUCACCAGAUUCAUCUGGGAGAGCU**  
**GCACGCAAUCCUGAGGGCGCCAGGAAGACUUCUACCCAUUUCUGAAGGAUAACAGGGA**

GAAGAUCGAAAAAUUCUGACAUUCCGCAUCCCCUACUAUGUGGGCCCUCUGGCAAG  
AGGCAACAGCCGGUUUGCCUGGAUGACUCGAAAUCUGAGGAAACAAUCACUCCUG  
GAACUUCGAGGAAGUGGUCGAUAAGGGCGCUUCCGCACAGUCUUUCAUUGAGCGGAU  
GACAAACUUCGACAAGAACCUGCCAAACGAAAAAGUGCUGCCCAAGCACUCUCUGCU  
GUACGAGUAUUUCACAGUCUAUAACGAACUGACUAAGGUGAAAUACGUCACCGAGGG  
GAUGAGAAAGCCUGCCUUCUGAGUGGAGAACAGAAGAAAGCUAUCGUGGACCUGCU  
GUUUAAAACCAUAGGAAGGUGACAGUCAAGCAGCUGAAAGAGGACUAUUUCAAGAA  
AAUUGAAUGUUUCGAUUCUGUGGAGAUCAUGGGCGUCGAAGACAGGUUUAACGCCUC  
CCUGGGGACCUACCACGAUCUGCUGAAGAUAUUAAGGAUAAAGACUUCUGGACAA  
CGAGGAAAUGAGGAUAUCCUGGAAGACAUUGUGCUGACCCUGACACUGUUUGAGGA  
UAGGGAAAUGAUCGAGGAACGCCUGAAGACCUAUGCCCAUCUGUUCGAUGACAAAGU  
GAUGAAACAGCUGAAGCGACGGAGAUACACAGGAUGGGGGCCGACUGUCUCGGAAGCU  
GAUCAAUGGGAUUCGCGACAAACAGAGUGGAAAGACCAUCCUGGACUUCUGAAAUC  
AGAUGGCUUCGCCAACCGGAACUUC AUGCAGCUGAUUCACGAUGACAGCCUGACAUI  
CAAAGAGGAUAUCCAGAAGGCACAGGUGUCCGGGCAGGGAGACUCUCUGCACGAGCA  
UAUCGCAAACCUGGCCGGCAGCCUGCCAUCAAGAAAGGGAUUCUGCAGACCGUGAA  
GGUGGUGGACGAGCUGGUGAAAGUCAUGGGAAGACAUAAAGCCAGAAAACAUCGUGAU  
UGAGAUGGCCAGGGAAAUCAGACCACACAGAAAGGCCAGAAGAACUCAAGGGAGCG  
CAUGAAAAGAAUCGAGGAAGGAAUUAAGGAACUGGGCAGCCAGAUCUGAAAGAGCA  
CCCCGUGGAAAACACACAGCUGCAGAAUGAGAAGCUGUAUCUGUACUAUCUGCAGAA  
UGGACGCGAU AUGUACGUGGACCAGGAGCUGGAUUAUAACCGACUGUCCGAUUACGA  
CGUGGAUCAUAUCGUCCCACAGUCAUUCUGAAAGAUGACAGCAUUGACAAUAAGGU  
GCUGACCCGCUCUGACAAAACCGAGGCAAGAGUGAUAAUGUCCCCUCAGAGGAAGU  
GGUCAAGAAAUGAAGAACUACUGGAGGCAGCUGCUGAAUGCCAAACUGAUCACACA  
GCGAAAGUUUGAUAAACCGACUAAAGCUGAGCGGGGAGGCCUGAGUGAACUGGACAA  
AGCAGGCUUCAUUAAGCGACAGCUGGUGGAGACACGGCAGAUACAAAGCACGUCGC  
CCAGAUUCUGGAUUAAGAAUGAACACUAAGUACGAUGAGAAUGACAAACUGAUCAG  
AGAAGUGAAGGUCAUUACCCUGAAGUCAAAACUGGUGAGCGACUUUCGGAAAGAUUU  
CCAGUUUUUAAGGUACAGAGAUCAACAACUACCACCAUGCUC AUGACGCAUACCUG  
AACGCAGUGGUCGGCACAGCCUGAUUAAGAAAUAACCUAAACUGGAGUCCGAGUUC  
GUGUACGGGGACUAUAAGGUGUACGAUGUCAGAAAAUGAUCGCCAAGUCUGAGCAG  
GAAAUUGGCAAAGCCACUGCUAAGUAUUUCUUUUACAGUAACAUCAUGAAUUUCUUUA  
AGACUGAGAUACCCUGGCAAAUGGGGAAAUCGAAAGCGGCCACUGAUUGAGACUA

ACGGCGAGACAGGAGAAAUCGUGUGGGACAAAGGAAGAGAUUUUGCUACCGUGAGGA  
AGGUCCUGAGCAUGCCCCAAGUGAAUUAUUGUCAAGAAAACAGAGGUGCAGACUGGGG  
GAUUCAGUAAGGAAUCAAUUCUGCCUAAACGCAACUCCGAUAAGCUGAUCGCCCGAA  
AGAAAGACUGGGACCCCAAGAAGUAUGGCGGGUUCGACUCCCAACUGUGGCUUACU  
CUGUCCUGGUGGUCGCAAAGGUGGAGAAGGGAAAAAGCAAGAAACUGAAAUCCGUCA  
AGGAACUGCUGGGCAUCACCAUUAUGGAGCGCAGCUCCUUCGAAAAGAAUCCUAUCG  
AUUUUCUGGAGGCCAAAGGCUAUAAGGAAGUGAAGAAAGACCUGAUCAUCAAGCUGC  
CAAAGUACUCACUGUUUGAGCUGGAAAACGGGAGAAAGAGGAUGCUGGCAAGCGCCG  
GGGAGCUGCAGAAAGGAAAUGAACUGGCCUCCUGCCUCCAAGUACGUGAACUCCUGU  
AUCUGGCUAGCCACUACGAGAAGCUGAAAGGGUCCCUAGAGGAUAACGAACAGAAAC  
AGCUGUUUGUGGAGCAGCACAAGCAUUAUCUGGACGAGAUCAUUGAACAGAUUAGCG  
AGUUCUCCAAAAGAGUGAUCCUGGCUGACGCAAUCUGGAUAAGGUCCUGAGCGCAU  
ACAACAAACACCGGGAUAAAGCCAAUCAGAGAGCAGGCCGAAAAUAUCAUUCAUCUGU  
UCACUCUGACCAACCUGGGAGCCCCCGCAGCCUUCAAGUAUUUUGACACUACCAUCGA  
UCGCAAACGAUACACAAGCACUAAGGAGGUGCUGGACGCUACCCUGAUUCAUCAGAG  
CAUUACUGGCCUGUAUGAAACAAGGAUUGACCUGUCUCAGCUGGGCGGCGACUCCGG  
AGCUGACCCCAAGAAGAAGAGGAAGGUGUGAUAAGUCUAGACCUUCUGCGGGGCUUGC  
CUUCUGGCCAUGCCCUUCUUCUCUCCCUUGCACCUGUACCUCUUGGUCUUUGAAUAAA  
GCCUGAGUAGGAAAAAAAAAAAAAAAAAAAAAAAAAAAAAAAAAAAAAAAAAAAAAAAAAAAA  
AAAAAAAAAAAAAAAAAAAAAAAAAAAAAAAAAAAAAAAAAAAAAAAAAAAAAAAAAAAAAAAA  
AAAAAA

miR-21-responsive Cas9 mRNA

GGUUCUUAAUCGCGGAUCCUCAACAUCAGUCUGAUAAAGCUAAGAUCACCGGUCGCCA  
CCAUGGAUAAGAAAUACAGCAUUGGACUGGACAUUGGGACAAACUCCGUGGGGAUGGG  
CCGUGAUUACAGACGAAUACAAAGUGCCUUCAAGAAGUUCAAGGUGCUGGGCAACA  
CCGAUAGACACAGCAUCAAGAAAAAUCUGAUUGGAGCCCUGCUGUUCGACUCCGGCG  
AGACAGCUGAAGCAACUCGGCUGAAAAGAACUGCUCGGAGAAGGUUAUACCCGCCGAA  
AGAAUAGGAUCUGCUACCUGCAGGAGAUUUUCAGCAACGAAAUGGCCAAGGUGGACG  
AUAGUUUCUUUCACCGCCUGGAGGAAUCAUUCUGGUCGAGGAAGAUAAAGAAACAG  
AGCGGCAUCCCAUCUUUGGCAACAUUGUGGACGAGGUCGCUUAUCACGAAAAGUACC  
CUACCAUCUAUCAUCUGAGGAAGAAACUGGUGGACUCCACAGAUAAAGCAGACCUGC  
GCCUGAUCUAUCUGGCCUUGGCUCACAUGAUUAAGUUCGGGGCCAUUUUCUGAUCG  
AGGGGGAUCUGAACCAGACAAUUCUGAUGUGGACAAGCUGUUAUCCAGCUGGUCC  
AGACAUACAAUCAGCUGUUUGAGGAAAACCCCAUUAAUGCAUCUGGGCUGGACGCAA  
AAGCCAUCCUGAGUGCCAGACUGUCUAAGAGUCGGAGACUGGAGAACCUGAUCGCUC  
AGCUGCCAGGGGAAAAGAAAACGGCCUGUUUGGAAUCUGAUUGCACUGUCACUGG  
GACUGACUCCCAACUUCAAGAGCAAUUUUGAUCUGGCCGAGGACGCUAAACUGCAGC  
UGUCCAAGGACACCUAUGACGAUGACCUGGAUAACCUGCUGGCUCAGAUCGGGGAUC  
AGUACGCAGACCUGUUCUGGCCGCUAAGAAUCUGUCUGACGCCAUCCUGCUGAGUG  
AUAUUCUGCGCGUGAACACCGAGAUUACAAAAGCCCCCUGUCAGCUAGCAUGAUCA  
AGAGAU AUGACGAGCACCAUCAGGAUCUGACCCUGCUGAAGGCUCUGGUGAGGCAGC  
AGCUGCCUGAGAAGUACAAGGAAAUCUUCUUUGAUCAGUCUAAGAACGGAUACGCCG  
GCUAUAUUGACGGCGGGGCUAGUCAGGAGGAGUUCUACAAGUUUAUCAAAACCAUUC  
UGGAGAAGAUGGAUGGCACAGAGGAACUGCUGGUGAAACUGAAUCGGGAAGACCUGC  
UGAGGAAGCAGCGCACUUUUGAUAAACGGAAGCAUCCUCACCAGAUUCAUCUGGGAG  
AGCUGCACGCAAUCCUGAGGCGCCAGGAAGACUUCUACCCAUUUCUGAAGGAUAACA  
GGGAGAAGAUCGAAAAAUUCUGACAUUCGCAUCCCCUACUAUGUGGGCCCUCUGG  
CAAGAGGCAACAGCCGGUUUGCCUGGAUGACUCGCAAUCUGAGGAAACAAUCACUC  
CCUGGAACUUCGAGGAAGUGGUCGAUAAGGGCGCUUCCGCACAGUCUUUCAUUGAGC  
GGAUGACAAACUUCGACAAGAACCUGCCAAACGAAAAAGUGCUGCCCAAGCACUCUC  
UGCUGUACGAGUAUUUCACAGUCUAUAACGAACUGACUAAGGUGAAAUAACGUCACCG  
AGGGGAUGAGAAAGCCUGCCUUCUGAGUGGAGAACAGAAGAAAGCUAUCGUGGACC  
UGCUGUUUAAAACCAUAGGAAGGUGACAGUCAAGCAGCUGAAAGAGGACUAUUUCA  
AGAAAAUUGAAUGUUUCGAUUCUGUGGAGAUCAUGGGCGUCGAAGACAGGUUUAACG



CCUCCUGGGGACCUACCACGAUCUGCUGAAGAUCAUUAAGGAUAAAGACUCCUGG  
ACAACGAGGAAAUGAGGAUAUCCUGGAAGACAUUGUGCUGACCCUGACACUGUUUG  
AGGAUAGGGAAAUGAUCGAGGAACGCCUGAAGACCUAUGCCCAUCUGUUCGAUGACA  
AAGUGAUGAAACAGCUGAAGCGACGGAGAUACACAGGAUGGGGCGACUGUCUCGGA  
AGCUGAUCAAUGGGAUUCGCGACAAACAGAGUGGAAAGACCAUCCUGGACUUUCUGA  
AAUCAGAUGGCUUCGCCAACCGGAACUUCAUGCAGCUGAUUCACGAUGACAGCCUGA  
CAUUCAAGAGGAUAUCCAGAAGGCACAGGUGUCCGGGCAGGGAGACUCUCUGCACG  
AGCAUAUCGCAAACCUUGGCCGGCAGCCCUGCCAUCAAGAAAGGGAUUCUGCAGACCG  
UGAAGGUGGUGGACGAGCUGGUGAAAGUCAUGGGAAGACAUAAAGCCAGAAAACAUCG  
UGAUUGAGAUGGCCAGGGAAAUCAGACCACACAGAAAGGCCAGAAGAACUCAAGGG  
AGCGCAUGAAAAGAAUCGAGGAAGGAAUUAAGGAACUGGGCAGCCAGAUCUGAAAG  
AGCACCCCGUGGAAAACACACAGCUGCAGAAUGAGAAGCUGUAUCUGUACUAUCUGC  
AGAAUGGACGCGAUUAGUACGUGGACCAGGAGCUGGAUAUUAACCGACUGUCCGAUU  
ACGACGUGGAUCAUAUCGUCCACAGUCAUCCUGAAAGAUGACAGCAUUGACAAUA  
AGGUGCUGACCCGCUCUGACAAAACCGAGGCAAGAGUGAUAAUGUCCCCUCAGAGG  
AAGUGGUCAAGAAAUGAAGAACUACUGGAGGCAGCUGCUGAAUGCCAAACUGAUCA  
CACAGCGAAAGUUUGAUAAACCUGACUAAAGCUGAGCGGGGAGGCCUGAGUGAACUGG  
ACAAAGCAGGCUUCAUUAAGCGACAGCUGGUGGAGACACGGCAGAUACAAAGCAGC  
UCGCCCAGAUUCUGGAUUCAAGAAUGAACACUAAGUACGAUGAGAAUGACAAACUGA  
UCAGAGAAGUGAAGGUCAUUACCCUGAAGUCAAAACUGGUGAGCGACUUUCGGAAAG  
AUUUCAGUUUUUAUAAGGUCAGAGAGAUACAACUACCACCAUGCUCAUGACGCAUA  
CCUGAACGCAGUGGUCGGCACAGCCCUGAUUAAGAAAUACCCUAAACUGGAGUCCGA  
GUUCGUGUACGGGGACUUAAGGUGUACGAUGUCAGAAAAUGAUCGCCAAGUCUGA  
GCAGGAAAUUGCAAAGCCACUGCUAAGUAUUUCUUUUACAGUAACAUCAUGAAUUUC  
UUUAAGACUGAGAUACCCUGGCAAUGGGGAAAUCCGAAAGCGGCCACUGAUUGAG  
ACUAACGGCGAGACAGGAGAAAUCGUGUGGGACAAAGGAAGAGAUUUUGCUACCGUG  
AGGAAGGUCCUGAGCAUGCCCCAAGUGAAUAUUGUCAAGAAAACAGAGGUGCAGACU  
GGGGGAUUCAGUAAGGAAUCAAUUCUGCCUAAACGCAACUCCGAUAAGCUGAUCGCC  
CGAAAGAAAGACUGGGACCCCAAGAAGUAUGGCGGGUUCGACUCCCCAACUGUGGCU  
UACUCUGUCCUGGUGGUCGCAAAGGUGGAGAAGGGAAAAAGCAAGAAACUGAAAUC  
GUCAAGGAACUGCUGGGCAUCACCAUUAUGGAGCGCAGCUCCUUCGAAAAGAAUCCU  
AUCGAUUUUCUGGAGGCCAAAGGCUAUAAGGAAGUGAAGAAAGACCUGAUCAUCAAG  
CUGCCAAAGUACUCACUGUUUGAGCUGGAAAACGGGAGAAAGAGGAUGCUGGCAAGC

GCCGGGGAGCUGCAGAAAGGAAAUGAACUGGCCCCUGCCCUCCAAGUACGUGAACUUC  
CUGUAUCUGGCUAGCCACUACGAGAAGCUGAAAGGGUCCCUAGAGGAUAACGAACAG  
AAACAGCUGUUUGUGGAGCAGCACAAGCAUUAUCUGGACGAGAUCAUUGAACAGAUU  
AGCGAGUUCUCCAAAAGAGUGAUCCUGGCUGACGCAAUCUGGAUAAGGUCCUGAGC  
GCAUACAACAAACACCGGGAUAAGCCAAUCAGAGAGCAGGCCGAAAUAUCAUUCAU  
CUGUUCACUCUGACCAACCUGGGAGCCCCGCAGCCUUCAAGUAUUUUGACACUACCA  
UCGAUCGCAAACGAUACACAAGCACUAAGGAGGUGCUGGACGCUACCCUGAUUCAUC  
AGAGCAUUACUGGCCUGUAUGAAACAAGGAUUGACCUGUCUCAGCUGGGCGGCGACU  
CCGGAGCUGACCCCAAGAAGAAGAGGAAGGUGUGAUAGUCUAGACCUUCUGCGGGGC  
UUGCCUUCUGGCCAUGCCCUUCUUCUCUCCCUUGCACCUGUACCUCUUGGUCUUUGAA  
UAAAGCCUGAGUAGGAAAAAAAAAAAAAAAAAAAAAAAAAAAAAAAAAAAAAAAAAAAAA  
AAAAAAAAAAAAAAAAAAAAAAAAAAAAAAAAAAAAAAAAAAAAAAAAAAAAAAAAAAAAA  
AAAAAAAAA

miR-302-responsive Cas9 mRNA

GGUUCUUAAUCGCGGAUCCAGCAAGUACAUCCACGUUUAAGUAGAUCACCGGUCGC  
CACCAUGGAUAAGAAAUACAGCAUUGGACUGGACAUUGGGACAAACUCCGUGGGGAUG  
GGCCGUGAUUACAGACGAAUACAAAGUGCCUUCAAAGAAGUUCAAGGUGCUGGGCAA  
CACCGAUAGACACAGCAUCAAGAAAAUCUGAUUGGAGCCCUGCUGUUCGACUCCGG  
CGAGACAGCUGAAGCAACUCGGCUGAAAAGAACUGCUCGGAGAAGGUUAUACCCGCCG  
AAAGAAUAGGAUCUGCUACCUGCAGGAGAUUUUCAGCAACGAAAUGGCCAAGGUGGA  
CGAUAGUUUCUUUCACCGCCUGGAGGAAUCAUUCUGGUCGAGGAAGAUAGAACA  
CGAGCGGCAUCCCAUCUUUGGCAACAUUGUGGACGAGGUCGUUAUCACGAAAAGUA  
CCCUACCAUCUAUCAUCUGAGGAAGAAACUGGUGGACUCCACAGAUAAAGCAGACCU  
GCGCCUGAUCUAUCUGGCCUUGGCUCACAUGAUUAAGUUCGGGGCCAUUUUCUGAU  
CGAGGGGGGAUCUGAACCCAGACAAUUCUGAUGUGGACAAGCUGUUCAUCCAGCUGGU  
CCAGACAUACAAUCAGCUGUUUGAGGAAAACCCCAUUAUGCAUCUGGCGUGGACGC  
AAAAGCCAUCCUGAGUGCCAGACUGUCUAAGAGUCGGAGACUGGAGAACCUGAUCGC  
UCAGCUGCCAGGGGAAAAGAAAACGGCCUGUUUGGAAUCUGAUUGCACUGUCACU  
GGGACUGACUCCCAACUUCAAGAGCAAUUUUGAUCUGGCCGAGGACGCUAAACUGCA  
GCUGUCCAAGGACACCUAUGACGAUGACCUGGAUAACCUGCUGGCUCAGAUCGGGGA  
UCAGUACGCAGACCUGUUCUGGCCGCUAAGAAUCUGUCUGACGCCAUCCUGCUGAG  
UGAUAUUCUGCGCGUGAACACCGAGAUUACAAAAGCCCCCUGUCAGCUAGCAUGAU  
CAAGAGAUUAGACGAGCACCAUCAGGAUCUGACCCUGCUGAAGGCUCUGGUGAGGCA  
GCAGCUGCCUGAGAAGUACAAGGAAAUCUUCUUUGAUCAGUCUAAGAACGGAUACGC  
CGGCUAUAUUGACGGCGGGGCUAGUCAGGAGGAGUUCUACAAGUUUAUCAAAACCAU  
UCUGGAGAAGAUGGAUGGCACAGAGGAACUGCUGGUGAAACUGAAUCGGGAAGACCU  
GCUGAGGAAGCAGCGCACUUUUGAUAAACGGAAGCAUCCUCACCAGAUUCAUCUGGG  
AGAGCUGCACGCAAUCCUGAGGCGCCAGGAAGACUUCUACCCAUUUCUGAAGGAUAA  
CAGGGAGAAGAU CGAAAAAUUCUGACAUUCCGCAUCCCUACUAUGUGGGCCUCU  
GGCAAGAGGCAACAGCCGGUUUGCCUGGAUGACUCGCAAUCUGAGGAAACAAUCAC  
UCCUGGAACUUCGAGGAAGUGGUCGAUAAGGGCGCUUCCGCACAGUCUUUCAUUGA  
GCGGAUGACAAACUUCGACAAGAACCUGCCAAACGAAAAGUGCUGCCCAAGCACUC  
UCUGCUGUACGAGUAUUUCACAGUCUAUAACGAACUGACUAAGGUGAAAUAACGUCAC  
CGAGGGGAUGAGAAAGCCUGCCUCCUGAGUGGAGAACAGAAGAAAGCUAUCGUGGA  
CCUGCUGUUUAAAACCAAUAGGAAGGUGACAGUCAAGCAGCUGAAAGAGGACUAUUU  
CAAGAAAAUUGAAUGUUUCGAUUCUGUGGAGAUCAGUGGCGUCGAAGACAGGUUUA

CGCCUCCCUGGGGACCUACCACGAUCUGCUGAAGAUCAUUAAGGAUAAAGACUCCU  
GGACAACGAGGAAAUGAGGAUAUCCUGGAAGACAUUGUGCUGACCCUGACACUGUU  
UGAGGAUAGGGAAAUGAUCGAGGAACGCCUGAAGACCUAUGCCCAUCUGUUCGAUGA  
CAAAGUGAUGAAACAGCUGAAGCGACGGAGAUACACAGGAUGGGGCGACUGUCUCG  
GAAGCUGAUCAAUGGGAUUCGCGACAAACAGAGUGGAAAGACCAUCCUGGACUUUCU  
GAAAUACGAUGGCUUCGCCAACCGGAACUUCAUGCAGCUGAUUCACGAUGACAGCCU  
GACAUUCAAGAGGAUAUCCAGAAGGCACAGGUGUCCGGGCAGGGAGACUCUCUGCA  
CGAGCAUAUCGCAAACCGGGCCGGCAGCCCUGCCAUCAAGAAAGGGAUUCUGCAGAC  
CGUGAAGGUGGUGGACGAGCUGGUGAAAGUCAUGGGAAGACAUAAGCCAGAAAACAU  
CGUGAUUGAGAUGGCCAGGGAAAUCAGACCACACAGAAAGGCCAGAAGAACUCAAG  
GGAGCGCAUGAAAAGAAUCGAGGAAGGAAUUAAGGAACUGGGCAGCCAGAUCUGAA  
AGAGCACCCCGUGGAAAACACACAGCUGCAGAAUGAGAAGCUGUAUCUGUACUAUCU  
GCAGAAUGGACGCGAUUAGUACGUGGACCAGGAGCUGGAUUAUAACCGACUGUCCGA  
UUACGACGUGGAUCAUAUCGUCCACAGUCAUUCUGAAAGAUGACAGCAUUGACAA  
UAAGGUGCUGACCCGCUCUGACAAAAACCGAGGCAAGAGUGAUAAUGUCCCCUCAGA  
GGAAGUGGUCAAGAAAUGAAGAACUACUGGAGGCAGCUGCUGAAUGCCAAACUGAU  
CACACAGCGAAAGUUUGAUAAACCUGACUAAAGCUGAGCGGGGAGGCCUGAGUGAACU  
GGACAAAGCAGGCUUCAUUAAGCGACAGCUGGUGGAGACACGGCAGAUACAAAGCA  
CGUCGCCCAGAUUCUGGAUUCAAGAAUGAACACUAAGUACGAUGAGAAUGACAAACU  
GAUCAGAGAAGUGAAGGUCAUUAACCCUGAAGUCAAAACUGGUGAGCGACUUUCGGAA  
AGAUUUCAGUUUUUAUAAAGGUCAGAGAGAUCAACAACUACCACCAUGCUCUAGACGCA  
UACCUGAACGCAGUGGUCGGCACAGCCCUGAUUAAGAAAUAACCUAACUGGAGUCC  
GAGUUCGUGUACGGGGACUAUAAGGUGUACGAUGUCAGAAAAUGAUCGCCAAGUCU  
GAGCAGGAAAUUGGCAAAGCCACUGCUAAGUAUUUCUUUUACAGUAACAUCAUGAAU  
UUCUUUAAGACUGAGAUACCCUGGCAAUGGGGAAAUCCGAAAGCGGCCACUGAUU  
GAGACUAACGGCGAGACAGGAGAAAUCGUGUGGGACAAAGGAAGAGAUUUUGCUACC  
GUGAGGAAGGUCCUGAGCAUGCCCAAGUGAAUAUUGUCAAGAAAACAGAGGUGCAG  
ACUGGGGGAUUCAGUAAGGAAUCAAUUCUGCCUAAACGCAACUCCGAUAAGCUGAUC  
GCCCGAAAGAAAGACUGGGACCCCAAGAAGUAUGGCGGGUUCGACUCCCCAACUGUG  
GCUUACUCUGUCCUGGUGGUCGAAAGGUGGAGAAGGGAAAAAGCAAGAAACUGAAA  
UCCGUCAAGGAACUGCUGGGCAUCACCAUUAUGGAGCGCAGCUCCUUCGAAAAGAAU  
CCUAUCGAUUUUCUGGAGGCCAAAGGCUAUAAGGAAGUGAAGAAAGACCUGAUAUC  
AAGCUGCCAAAGUACUCACUGUUUGAGCUGGAAAACGGGAGAAAGAGGAUGCUGGCA

AGCGCCGGGAGCUGCAGAAAGGAAAUGAACUGGCCUCCUCCAAGUACGUGAAC  
UCCUGUAUCUGGCUAGCCACUACGAGAAGCUGAAAGGGUCCCCUGAGGAUAACGAA  
CAGAAACAGCUGUUUGUGGAGCAGCACAAAGCAUUAUCUGGACGAGAUCAUUGAACAG  
AUUAGCGAGUUCUCCAAAAGAGUGAUCCUGGCUGACGCAAUCUGGAUAAGGUCCUG  
AGCGCAUACAACAACACCGGGUAAGCCAAUCAGAGAGCAGGCCGAAAAUAUCAU  
CAUCUGUUCACUCUGACCAACCUGGGAGCCCCGCAGCCUUAAGUAUUUUGACACUA  
CCAUCGAUCGCAAACGAUACACAAGCACUAAGGAGGUGCUGGACGCUACCCUGAUUC  
AUCAGAGCAUUAUCUGGCCUGUAUGAAACAAGGAUUGACCUGUCUCAGCUGGGCGGCG  
ACUCCGGAGCUGACCCCAAGAAGAAGAGGAAGGUGUGAUAGUCUAGACCUUCUGCGG  
GGCUUGCCUUCUGGCCAUGCCCUUCUUCUCUCCCUUGCACCUGUACCUCUUGGUCUUU  
GAAUAAAGCCUGAGUAGGAAAAAAAAAAAAAAAAAAAAAAAAAAAAAAAAAAAAAAAAA  
AAAAAAAAAAAAAAAAAAAAAAAAAAAAAAAAAAAAAAAAAAAAAAAAAAAAAAAAAAAA  
AAAAAAAAAAAA

4x miR-302-responsive Cas9 mRNA

GGUUCUUAAUCGCGGAUCCAGCAAGUACAUCCACGUUUAAGUAGCAAGUACAUCCACG  
UUUAAGUAGCAAGUACAUCCACGUUUAAGUAGCAAGUACAUCCACGUUUAAGUAGAUCA  
CACCGGUCGCCACCAUGGAUAAGAAAUACAGCAUUGGACUGGACAUUGGGACAAACU  
CCGUGGGAUUGGGCCGUGAUUACAGACGAAUACAAAGUGCCUCAAAGAAGUUCAAGG  
UGCUGGGCAACACCGAUAGACACAGCAUCAAGAAAAUCUGAUUGGAGCCCGUCUGU  
UCGACUCCGGCGAGACAGCUGAAGCAACUCGGCUGAAAAGAACUGCUCGGAGAAGGU  
AUACCCGCCGAAAGAAUAGGAUCUGCUACCUGCAGGAGAUUUUCAGCAACGAAAUGG  
CCAAGGUGGACGAUAGUUUCUUUACCGCCUGGAGGAAUCAUUCUGGUCGAGGAAG  
AUAAGAAACACGAGCGGCAUCCCAUCUUUGGCAACAUUGUGGACGAGGUCGCUUAUC  
ACGAAAAGUACCCUACCAUCUAUCAUCUGAGGAAGAAACUGGUGGACUCCACAGAU  
AAGCAGACCUGCGCCUGAUCUAUCUGGCCUGGCUCACAUGAUUAAGUUCGGGGCC  
AUUUUCUGAUCGAGGGGGGAUCUGAACCCAGACAAUUCUGAUGUGGACAAGCUGUUA  
UCCAGCUGGUCCAGACAUACAUCAGCUGUUUGAGGAAAACCCCAUUAUGCAUCUG  
GCGUGGACGAAAAGCCAUCCUGAGUGCCAGACUGUCUAAGAGUCGGAGACUGGAGA  
ACCGAUCGCUCAGCUGCCAGGGGAAAAGAAAACGGCCUGUUUGGGAUCUGAUUG  
CACUGUCACUGGGACUGACUCCCAACUUAAGAGCAAUUUUGAUCUGGCCGAGGACG  
CUAAACUGCAGCUGUCCAAGGACACCUAUGACGAUGACCUGGAUAACCUGCUGGCUC  
AGAUCGGGGAUCAGUACGCAGACCUGUUCUGGCCGCUAAGAAUCUGUCUGACGCCA  
UCCUGCUGAGUGAUUUCUGCGCGUGAACACCGAGAUUACAAAAGCCCCCUGUCAG  
CUAGCAUGAUAAGAGAUUUGACGAGCACCAUCAGGAUCUGACCUGCUGAAGGCUC  
UGGUGAGGCAGCAGCUGCCUGAGAAGUACAAGGAAAUCUUCUUUGAUCAGUCUAAGA  
ACGGAUACGCCGGCUAUUUGACGGCGGGGCUAGUCAGGAGGAGUUCUACAAGUUUA  
UCAAACCCAUUCUGGAGAAGAUGGAUGGCACAGAGGAACUGCUGGUGAAACUGAAUC  
GGGAAGACCUGCUGAGGAAGCAGCGCACUUUUGAUAAACGGAAGCAUCCUCACCAGA  
UUCAUCUGGGAGAGCUGCACGCAAUCCUGAGGGCGCCAGGAAGACUUCUACCCAUUUC  
UGAAGGAUAACAGGGAGAAGAUCGAAAAAAUUCUGACAUUCGCAUCCCUACUAUG  
UGGGCCCUCUGGCAAGAGGCAACAGCCGGUUUGCCUGGAUGACUCGCAAUCUGAGG  
AAACAUCACUCCUGGAACUUCGAGGAAGUGGUCGAUAAGGGCGCUUCCGCACAGU  
CUUUCAUUGAGCGGAUGACAACUUCGACAAGAACCUGCCAACGAAAAGUGCUCG  
CCAAGCACUCUCUGCUGUACGAGUAUUUCACAGUCUAUAACGAACUGACUAAGGUGA  
AAUACGUCACCGAGGGGAUGAGAAAGCCUGCCUCCUGAGUGGAGAACAGAAGAAAG  
CUAUCGUGGACCUGCUGUUUAAAACCAAUAGGAAGGUGACAGUCAAGCAGCUGAAAG

AGGACUAUUUCAAGAAAAUUGAAUGUUUCGAUUCUGUGGAGAUCAGUGGCGUCGAAG  
ACAGGUUUAACGCCUCCCUGGGGACCUACCACGAUCUGCUGAAGAUCAUUAAGGAUA  
AAGACUCCUGGACAACGAGGAAAAUGAGGAUAUCCUGGAAGACAUUGUGCUGACCC  
UGACACUGUUUGAGGAUAGGGAAAUGAUCGAGGAACGCCUGAAGACCUAUGCCCAUC  
UGUUCGAUGACAAAGUGAUGAAACAGCUGAAGCGACGGAGAUACACAGGAUGGGGCC  
GACUGUCUCGGAAGCUGAUCAAUGGGAUUCGCGACAAACAGAGUGGAAAGACCAUCC  
UGGACUUUCUGAAAUCAGAUGGCUUCGCCAACCGGAACUUCAUGCAGCUGAUUCACG  
AUGACAGCCUGACAUUCAAGAGGAUAUCCAGAAGGCACAGGUGUCCGGGCAGGGAG  
ACUCUCUGCAGAGCAUAUCGCAAACCUGGCCGGCAGCCCUGCCAUCAAGAAAGGGA  
UUCUGCAGACCGUGAAGGUGGUGGACGAGCUGGUGAAAGUCAUGGGAAGACAUAAAGC  
CAGAAAACAUCGUGAUUGAGAUGGCCAGGGAAAAUCAGACCACACAGAAAGGCCAGA  
AGAACUCAAGGGAGCGCAUGAAAAGAAUCGAGGAAGGAAUUAAGGAACUGGGCAGCC  
AGAUCUGAAAGAGCACCCCGUGGAAAACACACAGCUGCAGAAUGAGAAGCUGUAUC  
UGUACUAUCUGCAGAAUGGACGCGAUUUGUACGUGGACCAGGAGCUGGAUUAUAACC  
GACUGUCCGAUUACGACGUGGAUCAUAUCGUCCCACAGUCAUUCUGAAAGAUGACA  
GCAUUGACAAUAAGGUGCUGACCCGCUCUGACAAAAACCGAGGCAAGAGUGAUAAUG  
UCCCCUCAGAGGAAGUGGUCAAGAAAAUGAAGAACUACUGGAGGCAGCUGCUGAAUG  
CCAAACUGAUCACACAGCGAAAGUUUGAUAAACCUGACUAAAGCUGAGCGGGGAGGCC  
UGAGUGAACUGGACAAAGCAGGCUUCAUUAAGCGACAGCUGGUGGAGACACGGCAGA  
UCACAAAGCACGUCGCCCAGAUUCUGGAUUCAAGAAUGAACACUAAGUACGAUGAGA  
AUGACAAACUGAUCAGAGAAGUGAAGGUCAUUAACCCUGAAGUCAAAACUGGUGAGCG  
ACUUUCGGAAAGAUUUCAGUUUUAUAAGGUCAGAGAGAUCAACAACUACCACCAUGC  
UCAUGACGCAUACCUGAACGCAGUGGUCGGCACAGCCCUGAUUAAGAAAUAACCUAA  
ACUGGAGUCCGAGUUCGUGUACGGGACUAUAAGGUGUACGAUGUCAGAAAAAUGAU  
CGCCAAGUCUGAGCAGGAAAUUGGCAAAGCCACUGCUAAGUAUUUCUUUUACAGUAA  
CAUCAUGAAUUUCUUUAAGACUGAGAUACCCUGGCAAUUGGGGAAAUCCGAAAGCG  
GCCACUGAUUGAGACUAACGGCGAGACAGGAGAAAUCGUGUGGGACAAAGGAAGAGA  
UUUUGCUACCGUGAGGAAGGUCCUGAGCAUGCCCCAAGUGAAUAUUGUCAAGAAAAC  
AGAGGUGCAGACUGGGGGAUUCAGUAAGGAAUCAAUUCUGCCUAAACGCAACUCCGA  
UAAGCUGAUCGCCGAAAGAAAGACUGGGACCCCAAGAAGUAUGGCGGGUUCGACUC  
CCCAACUGUGGCUUACUCUGUCCUGGUGGUCGCAAAGGUGGAGAAGGGAAAAAGCAA  
GAAACUGAAAUCGUAAGGAACUGCUGGGCAUCACCAUUAUGGAGCGCAGCUCCUU  
CGAAAAGAAUCCUAUCGAUUUUCUGGAGGCCAAAGGCUAUAAGGAAGUGAAGAAAGA

CCUGAUCAUCAAGCUGCCAAAGUACUCACUGUUUGAGCUGGAAAACGGGAGAAAGAG  
GAUGCUGGCAAGCGCCGGGAGCUGCAGAAAGGAAAUGAACUGGCCUGCCCUCCAA  
GUACGUGAACUCCUGUAUCUGGCUAGCCACUACGAGAAGCUGAAAGGGUCCCUUGA  
GGAUAACGAACAGAAACAGCUGUUUGUGGAGCAGCACAAAGCAUUAUCUGGACGAGAU  
CAUUGAACAGAUUAGCGAGUUCUCCAAAAGAGUGAUCCUGGCUGACGCAAUCUGGA  
UAAGGUCCUGAGCGCAUACAACAACACCGGGAUAAAGCCAAUCAGAGAGCAGGCCGA  
AAUAUCAUUAUCUGUUCACUCUGACCAACCUGGGAGCCCCCGCAGCCUUCAAGUUA  
UUUGACACUACCAUCGAUCGCAAACGAUACACAAGCACUAAGGAGGUGCUGGACGCU  
ACCCUGAUUCAUCAGAGCAUUACUGGCCUGUAUGAAACAAGGAUUGACCUGUCUCAG  
CUGGGCGGCGACUCCGGAGCUGACCCCAAGAAGAAGAGGAAGGUGUGAUAGUCUAGA  
CCUUCUGCGGGGCUUGCCUUCUGGCCAUGCCCUUCUUCUCUCCCUUGCACCUGUACCU  
CUUGGUCUUUGAAUAAAGCCUGAGUAGGAAAAAAAAAAAAAAAAAAAAAAAAAAAAAAAAA  
AAAAAAAAAAAAAAAAAAAAAAAAAAAAAAAAAAAAAAAAAAAAAAAAAAAAAAAAAAAAA  
AAAAAAAAAAAAAAAAAAAAAAAAAAAAA



Kt-Cas9 mRNA

**GGAUCCGUGAUCGGAAACGUGAGAUC**ACCUCAGAUCCGCUAGGACACCCGCAGAUCG  
AGAAGAAGGCGAAUUAAGAGAGAAAAGAAGAGUAAGAAGAAAUUAAGACACCGGUCGC  
CACCAUGGAUAAGAAUACAGCAUUGGACUGGACAUUGGGACAAACUCCGUGGGAUG  
GGCCGUGAUUACAGACGAAUACAAAGUGCCUUCAAGAAGUUCAAGGUGCUGGGCAA  
CACCGAUAGACACAGCAUCAAGAAAAUCUGAUUGGAGCCCUGCUGUUCGACUCCGG  
CGAGACAGCUGAAGCAACUCGGCUGAAAAGAACUGCUCGGAGAAGGUUAUACCCGCCG  
AAAGAAUAGGAUCUGCUACCUGCAGGAGAUUUUCAGCAACGAAAUGGCCAAGGUGGA  
CGAUAGUUUCUUUCACCGCCUGGAGGAAUCAUUCUGGUCGAGGAAGAUAAAGAAACA  
CGAGCGGCAUCCCAUCUUUGGCAACAUUGUGGACGAGGUCGCUUAUCACGAAAAGUA  
CCCUACCAUCUAUCAUCUGAGGAAGAAACUGGUGGACUCCACAGAUAAAGCAGACCU  
GCGCCUGAUCUAUCUGGCCUGGCUCACAUGAUUAAGUUCGGGGCCAUUUUCUGAU  
CGAGGGGGAUCUGAACCCAGACAAUUCUGAUGGACAAGCUGUUCAUCCAGCUGGU  
CCAGACAUACAAUCAGCUGUUUGAGGAAAACCCCAUUAUGCAUCUGGCGUGGACGC  
AAAAGCCAUCCUGAGUGCCAGACUGUCUAAGAGUCGGAGACUGGAGAACCUGAUCGC  
UCAGCUGCCAGGGGAAAAGAAAACGGCCUGUUUGGGAUCUGAUUGCACUGUCACU  
GGGACUGACUCCCAACUUAAGAGCAAUUUGAUCUGGCCGAGGACGCUAAACUGCA  
GCUGUCCAAGGACACCUAUGACGAUGACCUGGAUAACCUGCUGGCUCAGAUCGGGGA  
UCAGUACGCAGACCUGUUCUGGCCGCUAAGAAUCUGUCUGACGCCAUCCUGCUGAG  
UGAUAUUCUGCGCGUGAACACCGAGAUUACAAAAGCCCCCUGUCAGCUAGCAUGAU  
CAAGAGAUUAGACGAGCACCAUCAGGAUCUGACCCUGCUGAAGGCUCUGGUGAGGCA  
GCAGCUGCCUGAGAAGUACAAGGAAAUCUUCUUUGAUCAGUCUAAGAACGGAUACGC  
CGGCUAUAUUGACGGCGGGGCUAGUCAGGAGGAGUUCUACAAGUUUAUCAAAACCAU  
UCUGGAGAAGAUGGAUGGCACAGAGGAACUGCUGGUGAAACUGAAUCGGGAAGACCU  
GCUGAGGAAGCAGCGCACUUUUGAUAAACGGAAGCAUCCUCACCAGAUUCAUCUGGG  
AGAGCUGCACGCAAUCCUGAGGCGCCAGGAAGACUUCUACCCAUUUCUGAAGGAUAA  
CAGGGAGAAGAUCGAAAAAUUCUGACAUCUCCGAUCCCUACUAUGUGGGCCUCU  
GGCAAGAGGCAACAGCCGGUUUGCCUGGAUGACUCGAAAUCUGAGGAAACAAUCAC  
UCCUGGAACUUCGAGGAAGUGGUCGAUAAGGGCGCUUCCGCACAGUCUUUCAUUGA  
GCGGAUGACAAACUUCGACAAGAACCUGCCAAACGAAAAGUGCUGCCCAAGCACUC  
UCUGCUGUACGAGUAUUUCACAGUCUAUAACGAACUGACUAAGGUGAAAUACGUCAC  
CGAGGGGAUGAGAAAGCCUGCCUCCUGAGUGGAGAACAGAAGAAAGCUAUCGUGGA  
CCUGCUGUUUAAAACCAAUAGGAAGGUGACAGUCAAGCAGCUGAAAGAGGACUAUUU

CAAGAAAUUGAAUGUUUCGAUUCUGUGGAGAUCAUGGGCGUCGAAGACAGGUUUA  
CGCCUCCCUGGGGACCUACCACGAUCUGCUGAAGAUAUAAGGAUAAAGACUCCU  
GGACAACGAGGAAAUGAGGAUAUCCUGGAAGACAUUGUGCUGACCCUGACACUGU  
UGAGGAUAGGGAAAUGAUCGAGGAACGCCUGAAGACCUAUGCCCAUCUGUUCGAUGA  
CAAAGUGAUGAAACAGCUGAAGCGACGGAGAUACACAGGAUGGGGCCGACUGUCUG  
GAAGCUGAUCAAUGGGAUUCGCGACAAACAGAGUGGAAAGACCAUCCUGGACUUUCU  
GAAUUCAGAUGGCUUCGCCAACCGGAACUUCAUGCAGCUGAUUCACGAUGACAGCCU  
GACAUUCAAGAGGAUAUCCAGAAGGCACAGGUGUCCGGGCAGGGAGACUCUCUGCA  
CGAGCAUAUCGCAAACCGGCCGCGCAGCCUGCCAUCAAGAAAGGGAUUCUGCAGAC  
CGUGAAGGUGGUGGACGAGCUGGUGAAAGUCAUGGGAAGACAUAAGCCAGAAAACAU  
CGUGAUUGAGAUGGCCAGGGAAAUCAGACCACACAGAAAGGCCAGAAGAACUCAAG  
GGAGCGCAUGAAAAGAAUCGAGGAAGGAAUUAAGGAACUGGGCAGCCAGAUCUGAA  
AGAGCACCCCGUGGAAAACACACAGCUGCAGAAUGAGAAGCUGUAUCUGUACUAUCU  
GCAGAAUGGACGCGAUUUGUACGUGGACCAGGAGCUGGAUAUUAACCGACUGUCCGA  
UUACGACGUGGAUCAUAUCGUCCACAGUCAUUCUGAAAGAUGACAGCAUUGACAA  
UAAGGUGCUGACCCGCUCUGACAAAACCGAGGCAAGAGUGAUAUUGUCCCCUCAGA  
GGAAGUGGUCAAGAAAUGAAGAACUACUGGAGGCAGCUGCUGAAUGCCAAACUGAU  
CACACAGCGAAAGUUUGAUAACCUGACUAAAGCUGAGCGGGGAGGCCUGAGUGAACU  
GGACAAAGCAGGCUUCAUUAAGCGACAGCUGGUGGAGACACGGCAGAUACAAAGCA  
CGUCGCCCAGAUUCUGGAUUAAGAAUGAACACUAAGUACGAUGAGAAUGACAAACU  
GAUCAGAGAAGUGAAGGUCAUUAACCCUGAAGUCAAAACUGGUGAGCGACUUUCGAA  
AGAUUUCAGUUUUUAUAGGUCAGAGAGAUCAACAACUACCACCAUGCUCAUGACGCA  
UACCUGAACGCAGUGGUCGGCACAGCCUGAUUAAGAAAUAACCUAAACUGGAGUCC  
GAGUUCGUGUACGGGGACUAUAAGGUGUACGAUGUCAGAAAAAUGAUCGCCAAGUCU  
GAGCAGGAAAUUGGCAAAGCCACUGCUAAGUAUUUCUUUACAGUAACAUCAUGAAU  
UUCUUUAAGACUGAGAUCACCCUGGCAAUUGGGGAAAUCGAAAGCGGCCACUGAUU  
GAGACUAACGGCGAGACAGGAGAAAUCGUGUGGGACAAAGGAAGAGAUUUUGCUACC  
GUGAGGAAGGUCCUGAGCAUGCCCCAAGUGAAUAUUGUCAAGAAAACAGAGGUGCAG  
ACUGGGGGAUUCAGUAAGGAAUCAAUUCUGCCUAAACGCAACUCCGAUAAGCUGAUC  
GCCCCAAAGAAAGACUGGGACCCCAAGAAGUAUGGCGGGUUCGACUCCCCAACUGUG  
GCUUACUCUGUCCUGGUGGUCGCAAAGGUGGAGAAGGGAAAAAGCAAGAAACUGAAA  
UCCGUCAAGGAACUGCUGGGCAUCACCAUUAUGGAGCGCAGCUCCUUCGAAAAGAAU  
CCUAUCGAUUUUCUGGAGGCCAAAGGCUAUAAGGAAGUGAAGAAAGACCUGAUC

AAGCUGCCAAAGUACUCACUGUUUGAGCUGGAAAACGGGAGAAAGAGGAUGCUGGCA  
AGCGCCGGGGAGCUGCAGAAAGGAAAUGAACUGGCCUCCUCCAAGUACGUGAAC  
UCCUGUAUCUGGCUAGCCACUACGAGAAGCUGAAAGGGUCCUCCUGAGGAUAACGAA  
CAGAAACAGCUGUUUGUGGAGCAGCACAAGCAUUAUCUGGACGAGAUCAUUGAACAG  
AUUAGCGAGUUCUCCAAAAGAGUGAUCCUGGCUGACGCAAUCUGGAUAAGGUCCUG  
AGCGCAUACAACAAACACCGGGAUAAAGCCAAUCAGAGAGCAGGCCGAAAAUAUCAU  
CAUCUGUUCACUCUGACCAACCUGGGAGCCCCCGCAGCCUUAAGUAUUUUGACACUA  
CCAUCGAUCGCAAACGAUACACAAGCACUAAGGAGGUGCUGGACGCUACCCUGAUUC  
AUCAGAGCAUUAUCUGGCCUGUAUGAAACAAGGAUUGACCUGUCUCAGCUGGGCGGCG  
ACUCCGGAGCUGACCCCAAGAAGAAGAGGAAGGUGUGAUAGUCUAGACCUUCUGCGG  
GGCUUGCCUUCUGGCCAUGCCUUCUUCUCUCCUUGCACCUGUACCUCUUGGUCUUU  
GAAUAAAGCCUGAGUAGGAAAAAAAAAAAAAAAAAAAAAAAAAAAAAAAAAAAAAAAAA  
AAAAAAAAAAAAAAAAAAAAAAAAAAAAAAAAAAAAAAAAAAAAAAAAAAAAAAAAAAAA  
AAAAAAAAAAAAA

*L7Ae mRNA*

GGGCGAAUUAAGAGAGAAAAGAAGAGUAAGAAGAAAUAUAAGACACCGGUCGCCACCAU  
GUACGUGAGAUUUGAGGUUCCUGAGGACAUGCAGAACGAAGCUCUGAGUCUGCUGGA  
GAAGGUUAGGGAGAGCGGUAAGGUAAAGAAAGGUACCAACGAGACGACAAAGGCUGU  
GGAGAGGGGACUGGCAAAGCUCGUUUACAUCGCAGAGGAUGUUGACCCGCCUGAGAU  
CGUUGCUCaucugccccuccucugcgaggagaagaaugugccguacauuuacguuAA  
AAGCAAGAACGACCUUGGAAGGGCUGUGGGCAUUGAGGUGCCAUGCGCUUCGGCAGC  
GAUAAUCAACGAGGGAGAGCUGAGAAAGGAGCUUGGAAGCCUUGUGGAGAAGAUUAA  
AGGCCUUCAGAAGAGAUCUCAUAUGCAUCUCGAGUGAUAGUCUAGACCUUCUGCGGG  
GCUUGCCUUCUGGCCAUGCCCUUCUUCUCUCCCUUGCACCUGUACCUCUUGGUCUUUG  
AAUAAAGCCUGAGUAGGAAAAAAAAAAAAAAAAAAAAAAAAAAAAAAAAAAAAAAAAAAAA  
AAAAAAAAAAAAAAAAAAAAAAAAAAAAAAAAAAAAAAAAAAAAAAAAAAAAAAAAAAAAAA  
AAAAAAAAAAAA

miR-21-responsive *L7Ae mRNA*

GGUUCUUAUCGCGGAUCCUCAACAUCAGUCUGAUAAGCUAAGAUCACACCGGUCGCC  
ACCAUGUACGUGAGAUUUGAGGUUCCUGAGGACAUGCAGAACGAAGCUCUGAGUCUG  
CUGGAGAAGGUUAGGGAGAGCGGUAAGGUAAAGAAAGGUACCAACGAGACGACAAAG  
GCUGUGGAGAGGGGACUGGCAAAGCUCGUUUACAUCGCAGAGGAUGUUGACCCGCCU  
GAGAUCGUUGCUCaucugccccuccucugcgaggagaagaaugugccguacauuuac  
GUUAAAAGCAAGAACGACCUUGGAAGGGCUGUGGGCAUUGAGGUGCCAUGCGCUUCG  
GCAGCGAUAAUCAACGAGGGAGAGCUGAGAAAGGAGCUUGGAAGCCUUGUGGAGAAG  
AUUAAAGGCCUUCAGAAGAGAUCUCAUAUGCAUCUCGAGUGAUAGUCUAGACCUUCUG  
CGGGGCUUGCCUUCUGGCCAUGCCCUUCUUCUCUCCCUUGCACCUGUACCUCUUGGUC  
UUUGAAUAAAGCCUGAGUAGGAAAAAAAAAAAAAAAAAAAAAAAAAAAAAAAAAAAAAA  
AAAAAAAAAAAAAAAAAAAAAAAAAAAAAAAAAAAAAAAAAAAAAAAAAAAAAAAAAAAAAA  
AAAAAAAAAAAA

Tag *BFP* mRNA

GGGCGAAUUAAGAGAGAAAAGAAGAGUAAGAAGAAAUAUAAGACACCGGUCGCCACCAU  
GGAUCCAGCGAGCUGAUUAAGGAGAACAUGCACAUGAAGCUGUACAUGGAGGGCAC  
CGUGGACAACCAUCACUUCAAGUGCACAUCCGAGGGCGAAGGCAAGCCCUACGAGGG  
CACCCAGACCAUGAGAAUCAAGGUGGUCGAGGGCGGCCUCUCCCCUUCGCCUUCGA  
CAUCCUGGCUACUAGCUUCCUCUACGGCAGCAAGACCUUCAUCAACCACACCCAGGGC  
AUCCCCGACUUCUUCAAGCAGUCCUUCCUGAGGGCUUCACAUGGGAGAGAGUCACC  
ACAUACGAAGACGGGGGCGUGCUGACCGCUACCCAGGACACCAGCCUCCAGGACGGC  
UGCCUCAUCUACAACGUCAAGAUCAGAGGGGUGAACUUCACAUCCAACGGCCUGUG  
AUGCAGAAGAAAACACUCGGCUGGGAGGCCUUCACCGAGACGCUGUACCCCGCUGAC  
GGCGGCCUGGAAGGCAGAAACGACAUGGCCUGAAGCUCGUGGGCGGGAGCCAUCUG  
AUCGCAAACAUCAAGACCACAUAUAGAUCCAAGAAACCCGCUAAGAACCUCAAGAUGC  
CUGGGCUCUACUUGUGGACUACAGACUGGAAAGAAUCAAGGAGGCCAACAACGAGA  
CCUACGUCGAGCAGCACGAGGUGGCAGUGGCCAGAUACUGCGACCUCUCCUAGCAAAC  
UGGGGCACAGAUCUCAUAUGCAUCUCGAGUGAUAGUCUAGACCUUCUGCGGGGCUUG  
CCUUCUGGCCAUGCCCUUCUUCUCUCCCUUGCACCUGUACCUCUUGGUCUUGAAUAA  
AGCCUGAGUAGGAAAAAAAAAAAAAAAAAAAAAAAAAAAAAAAAAAAAAAAAAAAAAAAAAA  
AAAAAAAAAAAAAAAAAAAAAAAAAAAAAAAAAAAAAAAAAAAAAAAAAAAAAAAAAAAAAAAA  
AAAAAAA

sgRNA<sub>GFP</sub>

GGGGGCACGGGCAGCUUGCCGGUUUUAGAGCUAGAAAUAGCAAGUUAAAAUAAGGCU  
AGUCCGUUAUCAACUUGAAAAAGUGGCACCGAGUCGGUGCUUU

sgRNA<sub>2GFP</sub>

GGGCACGGGCAGCUUGCCGGUUUUAGAGCUAGAAAUAGCAAGUUAAAAUAAGGCUAG  
UCCGUUAUCAACUUGAAAAAGUGGCACCGAGUCGGUGCUUU

sgRNA<sub>DMD</sub>

GGUAUCUUACAGGAACUCCGUUUUAGAGCUAGAAAUAGCAAGUUAAAAUAAGGCUAGUC  
CGUUAUCAACUUGAAAAAGUGGCACCGAGUCGGUGCUUU

sgRNA<sub>Alu1</sub>

GGCCUGUAAUCCAGCACUUUUUUUAGAGCUAGAAAUAGCAAGUUAAAAUAAGGCUA  
GUCCGUUAUCAACUUGAAAAAGUGGCACCGAGUCGG

### Supplementary Table S6: Plasmid sequences used in this study

1. The protein coding regions (Cas9, L7Ae or BFP) are shown as bold letters.
2. The start and stop codons are underlined.
3. L7Ae was cloned from L7Ae plasmid provided by A. Huttenhofer (Innsbruck Medical University, Biocenter) and T.S. Rozhdestvensky (University of Muenster).
4. BFP was cloned from pTagBFP-actin (Evrogen).

#### pHL-EF1a-SphcCas9 (Addgene, Plasmid #60599)

GAAAAGTGCCACCTGACGTCGCTAGCgtttaaaccgggcatcgctctagactagtgcgccgctgcagAAGC  
TTTGCAAAGATGGATAAAGTTTTAAACAGAGAGGAATCTTTGCAGCTAATGGACCTTCTAGGT  
CTTGAAAGGAGTGGGAATTGGCTCCGGTGCCCGTCAGTGGGCAGAGCGCACATCGCCCA  
CAGTCCCCGAGAAGTTGGGGGGAGGGGTCGGCAATTGAACCGGTGCCTAGAGAAGGTGG  
CGCGGGGTAAACTGGGAAAGTGATGTCGTGTAAGTGGCTCCGCCTTTTTCCCGAGGGTGGG  
GGAGAACCGTATATAAGTGCAGTAGTCGCCGTGAACGTTCTTTTTCGCAACGGGTTTGCCG  
CCAGAACACAGGTAAGTGCCGTGTGTGGTTCCCGCGGGCCTGGCCTCTTTACGGGTTATG  
GCCCTTGCGTGCCTTGAATTAATCCACGCCCTGGCTGCAGTACGTGATTCTTGATCCCG  
AGCTTCGGGTTGGAAGTGGGTGGGAGAGTTCGAGGCCTTGCGCTTAAGGAGCCCCTTCG  
CCTCGTGCTTGAGTTGAGGCCTGGCCTGGGCGCTGGGGCCGCGCGTGCGAATCTGGTG  
GCACCTTCGCGCCTGTCTCGCTGCTTTGATAAGTCTCTAGCCATTTAAAATTTTTGATGACC  
TGCTGCGACGCTTTTTTTCTGGCAAGATAGTCTTGAAATGCGGGCCAAGATCTGCACACTG  
GTATTTTCGTTTTTTGGGGCCGCGGGCGGCGACGGGGCCCGTGCGTCCCAGCGCACATGT  
TCGGCGAGGCGGGCCTGCGAGCGCGGCCACCGAGAATCGGACGGGGGTAGTCTCAAG  
CTGGCCGGCCTGCTCTGGTGCCTGGCCTCGCGCCGCGGTGTATCGCCCCGCCCTGGGCG  
GCAAGGCTGGCCCGGTGCGCACCAAGTTGCGTGAGCGGAAAGATGGCCGCTTCCCGGCC  
TGCTGCAGGGAGCTCAAATGGAGGACGCGGCGCTCGGGAGAGCGGGCGGGTGAAGTCA  
CCCACACAAAGGAAAAGGGCCTTTCCGTCCTCAGCCGTGCTTCATGTGACTCCACGGAG  
TACCGGGCGCCGTCCAGGCACCTCGATTAGTTCTCGAGCTTTTGGAGTACGTGCTCTTAG  
GTTGGGGGGAGGGTTTTATGCGATGGAGTTTCCCACACTGAGTGGGTGGAGACTGAAG  
TTAGGCCAGCTTGGCACTTGATGTAATTCTCCTTGGAAATTTGCCCTTTTTGAGTTTGGATCTT  
GGTTCATTCTCAAGCCTCAGACAGTGGTTCAAAGTTTTTTCTTCCATTTAGGTGTCGTGA  
GAATTAGCGGTGGCGGCCATCACAAAGTTTGTACAAAAAGCAGGCTGGCGCCGGAACCAA  
TTCAGTCGACCATGGATAAGAAATACAGCATTGGACTGGACATTGGGACAAACTCCGTGG

GATGGGCCGTGATTACAGACGAATACAAAGTGCCTTCAAAGAAGTTCAAGGTGCTGGGC  
AACACCGATAGACACAGCATCAAGAAAAATCTGATTGGAGCCCTGCTGTTCTCGACTCCGGC  
GAGACAGCTGAAGCAACTCGGCTGAAAAGAAGTCTCGGAGAAGGTATACCCGCCGAA  
AGAATAGGATCTGCTACCTGCAGGAGATTTTCAGCAACGAAATGGCCAAGGTGGACGATA  
GTTTCTTTCACCGCCTGGAGGAATCATTCTGGTTCGAGGAAGATAAGAAACACGAGCGG  
CATCCCATCTTTGGCAACATTGTGGACGAGGTCTGCTTATCACGAAAAGTACCCTACCATCT  
ATCATCTGAGGAAGAACTGGTGGACTCCACAGATAAAGCAGACCTGCGCCTGATCTATC  
TGGCCCTGGCTCACATGATTAAGTTCCGGGGCCATTTTCTGATCGAGGGGGATCTGAACC  
CAGACAATTCTGATGTGGACAAGCTGTTTCATCCAGCTGGTCCAGACATACAATCAGCTGT  
TTGAGGAAAACCCATTAATGCATCTGGCGTGGACGCAAAAGCCATCCTGAGTGCCAGA  
CTGTCTAAGAGTCGGAGACTGGAGAACCTGATCGCTCAGCTGCCAGGGGAAAAGAAAA  
CGGCCTGTTTGGGAATCTGATTGCACTGTCACTGGGACTGACTCCCAACTTCAAGAGCAA  
TTTTGATCTGGCCGAGGACGCTAAACTGCAGCTGTCCAAGGACACCTATGACGATGACCT  
GGATAACCTGCTGGCTCAGATCGGGATCAGTACGCAGACCTGTTCTGGCCGCTAAGA  
ATCTGTCTGACGCCATCCTGCTGAGTGATATTCTGCGCGTGAACACCGAGATTACAAAAG  
CCCCCTGTCAGCTAGCATGATCAAGAGATATGACGAGCACCATCAGGATCTGACCCTGC  
TGAAGGCTCTGGTGAGGCAGCAGCTGCCTGAGAAGTACAAGGAAATCTTCTTTGATCAGT  
CTAAGAACGGATACGCCGGCTATATTGACGGCGGGCTAGTCAGGAGGAGTTCTACAAGT  
TTATCAAACCCATTCTGGAGAAGATGGATGGCACAGAGGAACTGCTGGTGAAACTGAATC  
GGGAAGACCTGCTGAGGAAGCAGCGCACTTTTGATAACGGAAGCATCCCTCACCAGATT  
CATCTGGGAGAGCTGCACGCAATCCTGAGGCGCCAGGAAGACTTCTACCCATTTCTGAA  
GGATAACAGGGAGAAGATCGAAAAAATTCTGACATTCCGCATCCCCTACTATGTGGGCCC  
TCTGGCAAGAGGCAACAGCCGGTTTGCCTGGATGACTCGCAAATCTGAGGAAACAATCA  
CTCCCTGGAACCTCGAGGAAGTGGTCGATAAGGGCGCTTCCGCACAGTCTTTCATTGAGC  
GGATGACAACTTCGACAAGAACCTGCCAAACGAAAAAGTGCTGCCAAGCACTCTCTG  
CTGTACGAGTATTTACAGTCTATAACGAACTGACTAAGGTGAAATACGTCACCGAGGGG  
ATGAGAAAGCCTGCCTTCTGAGTGGAGAACAGAAGAAAGCTATCGTGACCTGCTGTT  
TAAAACCAATAGGAAGGTGACAGTCAAGCAGCTGAAAGAGGACTATTTCAAGAAAATTGA  
ATGTTTCGATTCTGTGGAGATCAGTGGCGTCGAAGACAGGTTTAACGCCTCCCTGGGGAC  
CTACCACGATCTGCTGAAGATCATTAAAGGATAAAGACTTCTTGACAACGAGGAAAATGA  
GGATATCCTGGAAGACATTGTGCTGACCCTGACACTGTTTGAGGATAGGGAAATGATCGA  
GGAACGCCTGAAGACCTATGCCATCTGTTTCGATGACAAAGTGATGAAACAGCTGAAGC  
GACGGAGATACAGGATGGGGCCGACTGTCTCGGAAGCTGATCAATGGGATTCGCGAC



AAACAGAGTGGAAGACCATCCTGGACTTTCTGAAATCAGATGGCTTCGCCAACCGGAA  
CTTCATGCAGCTGATTCACGATGACAGCCTGACATTCAAAGAGGATATCCAGAAGGCACA  
GGTGTCCGGGCAGGGAGACTCTCTGCACGAGCATATCGCAAACCTGGCCGGCAGCCCT  
GCCATCAAGAAAGGGATTCTGCAGACCGTGAAGGTGGTGGACGAGCTGGTGAAAGTCAT  
GGGAAGACATAAGCCAGAAAACATCGTGATTGAGATGGCCAGGGAAAATCAGACCACAC  
AGAAAGGCCAGAAGAACTCAAGGGAGCGCATGAAAAGAATCGAGGAAGGAATTAAGGA  
ACTGGGCAGCCAGATCCTGAAAGAGCACCCCGTGGAAAACACACAGCTGCAGAATGAG  
AAGCTGTATCTGTACTATCTGCAGAATGGACGCGATATGTACGTGGACCAGGAGCTGGAT  
ATTAACCGACTGTCCGATTACGACGTGGATCATATCGTCCCACAGTCATTCTGAAAGATG  
ACAGCATTGACAATAAGGTGCTGACCCGCTCTGACAAAAACCGAGGCAAGAGTGATAAT  
GTCCCCTCAGAGGAAGTGGTCAAGAAAATGAAGAACTACTGGAGGCAGCTGCTGAATGC  
CAAAGTATCACACAGCGAAAGTTTGATAACCTGACTAAAGCTGAGCGGGGAGGCCTGA  
GTGAACTGGACAAAGCAGGCTTCATTAAGCGACAGCTGGTGGAGACACGGCAGATCACA  
AAGCACGTCGCCCAGATTCTGGATTCAAGAATGAACACTAAGTACGATGAGAATGACAAA  
CTGATCAGAGAAGTGAAGGTCATTACCCTGAAGTCAAAGTGGTGAGCGACTTTCGGAA  
AGATTTCCAGTTTTATAAGGTCAGAGAGATCAACAACCTACCACCATGCTCATGACGCATAC  
CTGAACGCAGTGGTCGGCACAGCCCTGATTAAGAAATACCCTAAACTGGAGTCCGAGTTC  
GTGTACGGGGACTATAAGGTGTACGATGTCAGAAAATGATCGCCAAGTCTGAGCAGGAA  
ATTGGCAAAGCCACTGCTAAGTATTTCTTTTACAGTAACATCATGAATTTCTTTAAGACTGA  
GATCACCCCTGGCAAATGGGGAAATCCGAAAGCGGCCACTGATTGAGACTAACGGCGAGA  
CAGGAGAAATCGTGTGGGACAAAGGAAGAGATTTTGCTACCGTGAGGAAGGTCCTGAGC  
ATGCCCAAGTGAATATTGTCAAGAAAACAGAGGTGCAGACTGGGGGATTGAGTAAGGA  
ATCAATTCTGCCTAACGCAACTCCGATAAGCTGATCGCCCGAAAGAAAGACTGGGACCC  
CAAGAAGTATGGCGGGTTCGACTCCCAACTGTGGCTTACTCTGTCCTGGTGGTTCGCAA  
GGTGGAGAAGGGAAAAAGCAAGAACTGAAATCCGTCAAGGAACTGCTGGGCATCACC  
ATTATGGAGCGCAGCTCCTTCGAAAAGAATCCTATCGATTTTCTGGAGGCCAAAGGCTATA  
AGGAAGTGAAGAAAGACCTGATCATCAAGCTGCCAAAGTACTCACTGTTTGAGCTGGAA  
AACGGGAGAAAGAGGATGCTGGCAAGCGCCGGGGAGCTGCAGAAAGGAAATGAACTG  
GCCCTGCCCTCCAAGTACGTGAACTTCTGTATCTGGCTAGCCACTACGAGAAGCTGAAA  
GGGTCCCCTGAGGATAACGAACAGAAACAGCTGTTTGTGGAGCAGCACAAAGCATTATCT  
GGACGAGATCATTGAACAGATTAGCGAGTTCTCCAAAAGAGTGATCCTGGCTGACGCAA  
ATCTGGATAAGGTCCTGAGCGCATACAACAAACACCGGGATAAGCCAATCAGAGAGCAG  
GCCGAAAATATCATTATCTGTTCACTCTGACCAACCTGGGAGCCCCCGCAGCCTTCAAG

TATTTTGACTACCATCGATCGCAAACGATACACAAGCACTAAGGAGGTGCTGGACGCT  
ACCCTGATTCATCAGAGCATTACTGGCCTGTATGAAACAAGGATTGACCTGTCTCAGCTG  
GGCGGCGACTCCGGAGCTGACCCCAAGAAGAAGAGGAAGGTGTGAGACCTCTAGACCC  
AGCTTTCTTGTACAAAGTGGTGATCTAGCTAAAACGCGGCCTCGAATCGAATCCGCCCCC  
CCCCCTCTCCCTCCCCCCCCCTAACGTTACTGGCCGAAGCCGCTTGGAATAAGGCCGGT  
GTGCGTTTGTCTATATGTTATTTTCCACCATATTGCCGTCTTTTGCAATGTGAGGGCCCGGA  
AACCTGGCCCTGTCTTCTTGACGAGCATTCTAGGGGTCTTTCCCCTCTCGCCAAAGGAAT  
GCAAGGTCTGTTGAATGTCGTGAAGGAAGCAGTTCCTCTGGAAGCTTCTTGAAGACAAACA  
ACGTCTGTAGCGACCCTTGCAGGCAGCGGAACCCCCACCTGGCGACAGGTGCCTCTG  
CGGCCAAAAGCCACGTGTATAAGATACACCTGCAAAGGCGGCACAACCCCAAGTGCCACGT  
TGTGAGTTGGATAGTTGTGGAAAGAGTCAAATGGCTCTCCTCAAGCGTATTCAACAAGGGG  
CTGAAGGATGCCAGAAGGTACCCATTGTATGGGATCTGATCTGGGGCCTCGGTGCACAT  
GCTTTACATGTGTTTAGTCGAGGTTAAAAACGTCTAGGCCCCCCGAACCACGGGGACGTG  
GTTTTCTTTGAAAACACGATGATAATATGGCCACAACCATGGTGAGCAAGGGCGAGGAG  
GATAACATGGCCATCATCAAGGAGTTCATGCGCTTCAAGGTGCACATGGAGGGCTCCGTGA  
ACGGCCACGAGTTCGAGATCGAGGGCGAGGGCGAGGGCCGCCCTACGAGGGCACCCA  
GACCGCCAAGCTGAAGGTGACCAAGGGTGGCCCCCTGCCCTTCGCCTGGGACATCCTGT  
CCCCTCAGTTCATGTACGGCTCCAAGGCCTACGTGAAGCACCCCGCCGACATCCCCGACT  
ACTTGAAGCTGTCCTTCCCCGAGGGCTTCAAGTGGGAGCGCGTGATGAACTTCGAGGACG  
GCGGCGTGGTGACCGTGACCCAGGACTCCTCCCTGCAGGACGGCGAGTTCATCTACAAG  
GTGAAGCTGCGCGGCACCAACTTCCCCTCCGACGGCCCCGTAATGCAGAAGAAGACCATG  
GGCTGGGAGGCCTCCTCCGAGCGGATGTACCCCGAGGACGGCGCCCTGAAGGGCGAGAT  
CAAGCAGAGGCTGAAGCTGAAGGACGGCGGCCACTACGACGCTGAGGTCAAGACCACCT  
ACAAGGCCAAGAAGCCCCTGCAGCTGCCCGGCGCCTACAACGTCAACATCAAGTTGGACA  
TCACCTCCCACAACGAGGACTACACCATCGTGGAACAGTACGAACGCGCCGAGGGCCGCC  
ACTCCACCGGCGGCATGGACGAGCTGTACAAGTAAAGCGCTCTAGGCTTAAGTATACCTCG  
AGTTAAATTCACCTCCTCAGGTGCAGGCTGCCTATCAGAAGGTGGTGGCTGGTGTGGCCAAT  
GCCCTGGCTCACAATAACCACTGAGATCTTTTTCCCTCTGCCAAAATTATGGGGACATCAT  
GAAGCCCCTTGAGCATCTGACTTCTGGCTAATAAAGGAAATTTATTTTCATTGCAATAGTGTG  
TTGGAATTTTTTGTGTCTCTCACTCGGAAGGACATATGGGAGGGCAAATCATTTAAAACATCA  
GAATGAGTATTTGGTTTAGAGTTTGGCAACATATGCCCATATGCTGGCTGCCATGAACAAAG  
GTTGGCTATAAAGAGGTCATCAGTATATGAAACAGCCCCCTGCTGTCCATTCTTATCCATA  
GAAAAGCCTTGACTTGAGGTTAGATTTTTTTTTATATTTTGTGTTATTTTTTTCTTTAACA

TCCCTAAAATTTTCCTTACATGTTTTACTAGCCAGATTTTTCTCCTCTCCTGACTACTCCCAG  
TCATAGCTGTCCCTCTTCTCTTATGGAGATCCCTCGACTTAATTAACCGGTCAGCTGCATTA  
ATGAATCGGCCAACGCGCGGGGAGAGGGGTTTGCCTATTGGGCGCTCTTCCGCTTCCTC  
GCTCACTGACTCGCTGCGCTCGGTCTGTTCCGGCTGCGGCGAGCGGTATCAGCTCACTCAA  
GGCGGTAATACGGTTATCCACAGAATCAGGGGATAACGCAGGAAAGAACATGTGAGCAAAA  
GGCCAGCAAAAGGCCAGGAACCGTAAAAAGGCCGCGTTGCTGGCGTTTTTCCATAGGCTC  
CGCCCCCTGACGAGCATCACAAAATCGACGCTCAAGTCAGAGGTGGCGAAACCCGACA  
GGACTATAAAGATACCAGGCGTTTCCCCTGGAAGCTCCCTCGTGCGCTCTCCTGTTCCGA  
CCCTGCCGTTACCGGATACCTGTCCGCTTTCTCCCTTCGGGAAGCGTGGCGCTTTCTCA  
TAGCTCACGCTGTAGGTATCTCAGTTCGGTGTAGGTCGTTCCGCTCCAAGCTGGGCTGTGTG  
CACGAACCCCCCGTTTCCGCGACCGCTGCGCCTTATCCGGTAACTATCGTCTTGAGTCCA  
ACCCGGTAAGACACGACTTATCGCCACTGGCAGCAGCCACTGGTAACAGGATTAGCAGAG  
CGAGGTATGTAGGCGGTGCTACAGAGTTCTTGAAGTGGTGGCCTAACTACGGCTACACTAG  
AAGAACAGTATTTGGTATCTGCGCTCTGCTGAAGCCAGTTACCTTCGGAAAAAGAGTTGGTA  
GCTCTTGATCCGGCAAACAAACCACCGCTGGTAGCGGTGGTTTTTTTTGTTTGAAGCAGCA  
GATTACGCGCAGAAAAAAGGATCTCAAGAAGATCCTTTGATCTTTTCTACGGGGTCTGACG  
CTCAGTGGAACGAAAACCTCACGTTAAGGGATTTTGGTCATGAGATTATCAAAAAGGATCTTC  
ACCTAGATCCTTTTAAATTAATAAATGAAGTTTTAAATCAATCTAAAGTATATATGAGTAACTTG  
GTCTGACAGTTACCAATGCTTAATCAGTGAGGCACCTATCTCAGCGATCTGTCTATTTGTTT  
ATCCATAGTTGCCTGACTCCCCGTGCTGTAGATAACTACGATACGGGAGGGCTTACCATCTG  
GCCCCAGTGCTGCAATGATACCGCGAGACCCACGCTCACCGGCTCCAGATTTATCAGCAAT  
AAACCAGCCAGCCGGAAGGGCCGAGCGCAGAAGTGGTCCTGCAACTTTATCCGCCTCCAT  
CCAGTCTATTAATTGTTGCCGGGAAGCTAGAGTAAGTAGTTCGCCAGTTAATAGTTTGCGCA  
ACGTTGTTGCCATTGCTACAGGCATCGTGGTGTACGCTCGTCTGTTTGGTATGGCTTCATTC  
AGCTCCGGTTCCCAACGATCAAGGCGAGTTACATGATCCCCATGTTGTGCAAAAAGCGG  
TTAGCTCCTTCGGTCCTCCGATCGTTGTCAGAAGTAAGTTGGCCGAGTGTTATCACTCATG  
GTTATGGCAGCACTGCATAATTCTTACTGTCATGCCATCCGTAAGATGCTTTTTCTGTGACT  
GGTGAGTACTCAACCAAGTCATTCTGAGAATAGTGTATGCGGCGACCGAGTTGCTCTTGCC  
CGGCGTCAATACGGGATAAATACCGCGCCACATAGCAGAACTTTAAAAGTGCTCATCATTGGA  
AAACGTTCTTCGGGGCGAAAACCTCTCAAGGATCTTACCGCTGTTGAGATCCAGTTTCGATGTA  
ACCCACTCGTGACCCAACTGATCTTCAGCATCTTTACTTTACCAGCGTTTCTGGGTGAG  
CAAAAACAGGAAGGCAAAATGCCGCAAAAAGGGAATAAGGGCGACACGGAAATGTTGAAT  
ACTCATACTCTTCCTTTTTCAATATTATTGAAGCATTATCAGGGTTATTGTCTCATGAGCGGA

TACATATTTGAATGTATTTAGAAAAATAACAATAGGGGTTCCGCGCACATTTCCC

pAM-L7Ae

TAATACGACTCACTATAGGGCGAATTCAGGAGCTCATATGCTGCAGGTGACACCATGGGAT  
CCATGTACGTGAGATTTGAGGTTCTGAGGACATGCAGAACGAAGCTCTGAGTCTGCTGG  
**AGAAGGTTAGGGAGAGCGGTAAGGTAAGAAAGGTACCAACGAGACGACAAAGGCTGT**  
**GGAGAGGGGACTGGCAAAGCTCGTTTACATCGCAGAGGATGTTGACCCGCCTGAGATCG**  
**TTGCTCATCTGCCCTCCTCTGCGAGGAGAAGAATGTGCCGTACATTTACGTTAAAAGCA**  
**AGAACGACCTTGAAGGGCTGTGGGCATTGAGGTGCCATGCGCTTCGGCAGCGATAATC**  
**AACGAGGGAGAGCTGAGAAAGGAGCTTGAAGCCTTGTGGAGAAGATTAAAGGCCTTC**  
**AGAAGAGATCTCATATGCATCTCGAGTGA**TAGTCTAGACAAGCTTGAGTATTCTATAGTGTC  
ACCTAAATAGCTTGGCGTAATCATGGTCATAGCTGTTTCCTGTGTGAAATTGTTATCCGCTCA  
CAATTCACACAACATACGAGCCGGAAGCATAAAGTGTAAGCCTGGGGTGCCTAATGAGT  
GAGCTAACTCACATTAATTGCGTTGCGCTCACTGCCCGCTTCCAGTCGGGAAACCTGTGC  
TGCCAGCTGCATTAATGAATCGGCCAACGCGCGGGGAGAGGCGGTTTTGCGTATTGGGCGC  
TCTCCGCTTCTCGCTCACTGACTCGCTGCGCTCGGTGTTTCGGCTGCGGCGAGCGGTA  
TCAGCTCACTCAAAGGCGGTAATACGGTTATCCACAGAATCAGGGGATAACGCAGGAAAGA  
ACATGTGAGCAAAAGGCCAGCAAAAGGCCAGGAACCGTAAAAAGGCCGCGTTGCTGGCGT  
TTTTCCATAGGCTCCGCCCCCTGACGAGCATCACAAAATCGACGCTCAAGTCAGAGGTG  
GCGAAACCCGACAGGACTATAAAGATACCAGGCGTTTTCCCCCTGGAAGCTCCCTCGTGCG  
CTCTCCTGTTCCGACCCTGCCGCTTACCGGATACCTGTCCGCCTTTCTCCCTTCGGGAAGC  
GTGGCGCTTTCTCATAGCTCACGCTGTAGGTATCTCAGTTCGGTGTAGGTCGTTTCGCTCCA  
AGCTGGGCTGTGTGCACGAACCCCCGTTACGCCGACCGCTGCGCCTTATCCGGTAACT  
ATCGTCTTGAGTCCAACCCGTAAGACACGACTTATCGCCACTGGCAGCAGCCACTGGTAA  
CAGGATTAGCAGAGCGAGGTATGTAGGCGGTGCTACAGAGTTCTTGAAGTGGTGGCCTAAC  
TACGGCTACACTAGAAGAACAGTATTTGGTATCTGCGCTCTGCTGAAGCCAGTTACCTTCGG  
AAAAAGAGTTGGTAGCTCTTGATCCGGCAAACAAACCACCGCTGGTAGCGGTGGTTTTTTT  
GTTTGCAAGCAGCAGATTACGCGCAGAAAAAAGGATCTCAAGAAGATCCTTTGATCTTTTC  
TACGGGGTCTGACGCTCAGTGGAACGAAAACCTCACGTTAAGGGATTTTGGTCATGAGATTAT  
CAAAAAGGATCTTCACCTAGATCCTTTTAAATTAATAAATGAAGTTTTAAATCAATCTAAAGTATA  
TATGAGTAAACTTGGTCTGACAGTTACCAATGCTTAATCAGTGAGGCACCTATCTCAGCGATC  
TGTCTATTTTCGTTTCATCCATAGTTGCCTGACTCCCCGTCGTGTAGATAACTACGATACGGGA  
GGGCTTACCATCTGGCCCCAGTGCTGCAATGATACCGCGAGACCCACGCTCACCGGCTCC  
AGATTTATCAGCAATAAACCAGCCAGCCGGAAGGGCCGAGCGCAGAAGTGGTCCTGCAAC  
TTTATCCGCCTCCATCCAGTCTATTAATTGTTGCCGGGAAGCTAGAGTAAGTAGTTCGCCAG

TTAATAGTTTGCGCAACGTTGTTGCCATTGCTACAGGCATCGTGGTGTACGCTCGTCGTTT  
GGTATGGCTTCATTCAGCTCCGGTTCCCAACGATCAAGGCGAGTTACATGATCCCCATGTT  
GTGCAAAAAGCGGTTAGCTCCTTCGGTCTCCGATCGTTGTCAGAAGTAAGTTGGCCGCA  
GTGTTATCACTCATGGTTATGGCAGCACTGCATAATTCTCTTACTGTCATGCCATCCGTAAGA  
TGCTTTTCTGTGACTGGTGAGTACTCAACCAAGTCATTCTGAGAATAGTGTATGCGGCGACC  
GAGTTGCTCTTGCCCGGCGTCAATACGGGATAATACCGCGCCACATAGCAGAACTTTAAAA  
GTGCTCATCATTGGAAAACGTTCTTCGGGGCGAAAACCTCTCAAGGATCTTACCGCTGTTGA  
GATCCAGTTCGATGTAACCCACTCGTGCACCCAACTGATCTTCAGCATCTTTTACTTTTACC  
AGCGTTTCTGGGTGAGCAAAAACAGGAAGGCAAAATGCCGCAAAAAGGGAATAAGGGCG  
ACACGGAAATGTTGAATACTCATACTCTTCCTTTTTCAATATTATTGAAGCATTATCAGGGTT  
ATTGTCTCATGAGCGGATACATATTTGAATGTATTTAGAAAAATAAACAAATAGGGGTTCCGC  
GCACATTTCCCGAAAAGTGCCACCTGATGCGGTGTGAAATACCGCACAGATGCGTAAGGA  
GAAAATACCGCATCAGGAAATTGTAAGCGTTAATATTTTGTAAATTCGCGTTAAATTTTTGT  
TAAATCAGCTCATTTTTTAACCAATAGGCCGAAATCGGCAAAATCCCTTATAAATCAAAGAAT  
AGACCGAGATAGGGTTGAGTGTTGTTCCAGTTTGAACAAGAGTCCACTATTAAGAACGT  
GGACTCCAACGTCAAAGGGCGAAAACCGTCTATCAGGGCGATGGCCCACTACGTGAACC  
ATCACCCATCAAGTTTTTTGGGGTCGAGGTGCCGTAAAGCACTAAATCGGAACCCTAAAG  
GGAGCCCCGATTTAGAGCTTGACGGGGAAAGCCGGCGAACGTGGCGAGAAAGGAAGGG  
AAGAAAGCGAAAGGAGCGGGCGCTAGGGCGCTGGCAAGTGTAGCGGTACGCTGCGCGT  
AACCACCACACCCGCCGCGCTTAATGCGCCGCTACAGGGCGCGTCCATTCGCCATTCAGG  
CTGCGCAACTGTTGGGAAGGGCGATCGGTGCGGGCCTCTTCGCTATTACGCCAGCTGGCG  
AAAGGGGGATGTGCTGCAAGGCGATTAAGTTGGGTAACGCCAGGGTTTTCCAGTCACGA  
CGTTGTAAAACGACGGCCAGTGAATTG

pA9-tagBFP

TCGCGCGTTTTCGGTGATGACGGTGAAAACCTCTGACACATGCAGCTCCCGGAGACGGTCA  
CAGCTTGTCTGTAAGCGGATGCCGGGAGCAGACAAGCCCGTCAGGGCGCGTCAGCGGGT  
GTTGGCGGGTGTCCGGGGCTGGCTTAACTATGCGGCATCAGAGCAGATTGTAAGTACTGAGAGTG  
CACCATATGCGGTGTGAAATACCGCACAGATGCGTAAGGAGAAAATACCGCATCAGGGCGCC  
ATTCCGCATTACAGGCTGCGCAACTGTTGGGAAGGGCGATCGGTGCGGGCCTCTTCGCTAT  
TACGCCAGCTGGCGAAAGGGGGATGTGCTGCAAGGCGATTAAGTTGGGTAACGCCAGGGT  
TTTCCCAGTCACGACGTTGTAACGACGGCCAGTGAATTCGAGCTCATATGCTGCAGGTC  
GACACCATGGGATCCAGCGAGCTGATTAAGGAGAACATGCACATGAAGCTGTACATGGA  
**GGGCACCGTGGACAACCATCACTTCAAGTGCACATCCGAGGGCGAAGGCAAGCCCTAC**  
**GAGGGCACCCAGACCATGAGAATCAAGGTGGTCGAGGGCGGCCCTCTCCCCTTCGCCTT**  
**CGACATCCTGGCTACTAGCTTCTCTACGGCAGCAAGACCTTCATCAACCACACCCAGGG**  
**CATCCCCGACTTCTTCAAGCAGTCCTTCCCTGAGGGCTTCACATGGGAGAGAGTCACCAC**  
**ATACGAAGACGGGGCGTGCTGACCGCTACCCAGGACACCAGCCTCCAGGACGGCTGC**  
**CTCATCTACAACGTCAAGATCAGAGGGGTGAACTTCACATCCAACGGCCCTGTGATGCAG**  
**AAGAAAACACTCGGCTGGGAGGCCTTACCCGAGACGCTGTACCCCGCTGACGGCGGCC**  
**TGGAAGGCAGAAACGACATGGCCCTGAAGCTCGTGGGCGGAGCCATCTGATCGCAAA**  
**CATCAAGACCACATATAGATCCAAGAAACCCGCTAAGAACCTCAAGATGCCTGGCGTCTA**  
**CTATGTGGACTACAGACTGGAAAGAATCAAGGAGGCCAACAACGAGACCTACGTCGAGC**  
**AGCACGAGGTGGCAGTGGCCAGATACTGCGACCTCCCTAGCAAACCTGGGGCACAGATCT**  
**CATATGCATCTCGAGTGA**TAGTCTAGACAAGCTTGGCGTAATCATGGTCATAGCTGTTTCCT  
GTGTGAAATTGTTATCCGCTCACAATTCCACACAACATACGAGCCGGAAGCATAAAGTGTA  
AGCCTGGGGTGCCTAATGAGTGAGCTAACTCACATTAATTGCGTTGCGCTCACTGCCCGCT  
TTCCAGTCGGGAAACCTGTGCTGCCAGCTGCATTAATGAATCGGCCAACGCGCGGGGAGA  
GGCGGTTTTCGCTATTGGGCGCTCTTCCGCTTCCCTCGCTCACTGACTCGCTGCGCTCGGTC  
GTTCCGGCTGCGGCGAGCGGTATCAGCTCACTCAAAGGCGGTAATACGGTTATCCACAGAAT  
CAGGGGATAACGCAGGAAAGAACATGTGAGCAAAAGGCCAGCAAAAGGCCAGGAACCGTA  
AAAAGGCCGCGTTGCTGGCGTTTTTCCATAGGCTCCGCCCCCTGACGAGCATCACAAAA  
TCGACGCTCAAGTCAGAGGTGGCGAAACCCGACAGGACTATAAAGATACCAGGGCTTTCCC  
CCTGGAAGCTCCCTCGTGCGCTCTCCTGTTCCGACCCTGCCGCTTACCGGATACCTGTCC  
GCCTTTCTCCCTTCGGGAAGCGTGGCGCTTTCTCATAGCTCACGCTGTAGGTATCTCAGTT  
CGGTGTAGGTCGTTCCGCTCCAAGCTGGGCTGTGTGCACGAACCCCCGTTACGCCCGACC  
GCTGCGCCTTATCCGGTAACTATCGTCTTGAGTCCAACCCGTAAGACACGACTTATCGCCA

CTGGCAGCAGCCACTGGTAACAGGATTAGCAGAGCGAGGTATGTAGGCGGTGCTACAGAG  
TTCTTGAAGTGGTGGCCTAACTACGGCTACACTAGAAGAACAGTATTTGGTATCTGCGCTCT  
GCTGAAGCCAGTTACCTTCGGAAAAAGAGTTGGTAGCTCTTGATCCGGCAAACAAACCACC  
GCTGGTAGCGGTGGTTTTTTTTGTTTGCAAGCAGCAGATTACGCGCAGAAAAAAGGATCTC  
AAGAAGATCCTTTGATCTTTTCTACGGGGTCTGACGCTCAGTGGAACGAAAACCTCACGTTAA  
GGGATTTTGGTCATGAGATTATCAAAAAGGATCTTCACCTAGATCCTTTTAAATTAATAATGAA  
GTTTTAAATCAATCTAAAGTATATATGAGTAACTTGGTCTGACAGTTACCAATGCTTAATCAG  
TGAGGCACCTATCTCAGCGATCTGTCTATTTTCGTTTCATCCATAGTTGCCTGACTCCCCGTCCG  
TGTAGATAACTACGATACGGGAGGGCTTACCATCTGGCCCCAGTGCTGCAATGATACCGCG  
AGACCCACGCTCACCGGCTCCAGATTTATCAGCAATAAACCAGCCAGCCGGAAGGGCCGA  
GCGCAGAAGTGGTCCTGCAACTTTATCCGCCTCCATCCAGTCTATTAATTGTTGCCGGGAAG  
CTAGAGTAAGTAGTTCGCCAGTTAATAGTTTGCGCAACGTTGTTGCCATTGCTACAGGCATC  
GTGGTGTACGCTCGTCGTTTGGTATGGCTTCATTCAGCTCCGGTCCCAACGATCAAGGC  
GAGTTACATGATCCCCATGTTGTGCAAAAAGCGGTTAGCTCCTTCGGTCTCCGATCGTT  
GTCAGAAGTAAGTTGGCCGCAGTGTTATCACTCATGGTTATGGCAGCACTGCATAATTCTCT  
TACTGTCATGCCATCCGTAAGATGCTTTTCTGTGACTGGTGAGTACTCAACCAAGTCATTCT  
GAGAATAGTGTATGCGGCGACCGAGTTGCTCTTGCCCGGCGTCAATACGGGATAATACCGC  
GCCACATAGCAGAACTTTAAAAGTGCTCATCATTGGAAAACGTTCTTCGGGGCGAAAACCTCT  
CAAGGATCTTACCGCTGTTGAGATCCAGTTCGATGTAACCCACTCGTGCACCCAACTGATCT  
TCAGCATCTTTTACTTTTACCAGCGTTTCTGGGTGAGCAAAAACAGGAAGGCAAAATGCCG  
CAAAAAGGGAATAAGGGCGACACGGAAATGTTGAATACTCATACTCTTCTTTTTTCAATATT  
ATTGAAGCATTATCAGGGTTATTGTCTCATGAGCGGATACATATTTGAATGTATTTAGAAAA  
TAAACAAATAGGGGTTCCGCGCACATTTCCCCGAAAAGTGCCACCTGACGTCTAAGAAACC  
ATTATTATCATGACATTAACCTATAAAAATAGGCGTATCACGAGGCCCTTTCGTC



## Supplementary Table S7: Transfection tables for all experiments in this study

| <b>Figure 2A-C</b>           |                   |                                         |                              |                             |           |
|------------------------------|-------------------|-----------------------------------------|------------------------------|-----------------------------|-----------|
|                              | Control Cas9 mRNA | sgRNA <sub>DMD</sub> (Negative control) | miR-302-responsive Cas9 mRNA | miR-21-responsive Cas9 mRNA | Untreated |
| Control Cas9 mRNA            | 100 ng            | 100 ng                                  |                              |                             |           |
| miR-302-responsive Cas9 mRNA |                   |                                         | 100 ng                       |                             |           |
| miR-21-responsive Cas9 mRNA  |                   |                                         |                              | 100 ng                      |           |
| sgRNA <sub>GFP</sub>         | 300 ng            |                                         | 300 ng                       | 300 ng                      |           |
| sgRNA <sub>DMD</sub>         |                   | 300 ng                                  |                              |                             |           |

| <b>Figure 2D</b>            |                   |                                         |                                                |                                                  |           |
|-----------------------------|-------------------|-----------------------------------------|------------------------------------------------|--------------------------------------------------|-----------|
|                             | Control Cas9 mRNA | sgRNA <sub>DMD</sub> (Negative control) | miR-21-responsive Cas9 mRNA + miR-21 inhibitor | miR-21-responsive Cas9 mRNA + negative inhibitor | Untreated |
| Control Cas9 mRNA           | 100 ng            | 100 ng                                  |                                                |                                                  |           |
| miR-21-responsive Cas9 mRNA |                   |                                         | 100 ng                                         | 100 ng                                           |           |
| sgRNA <sub>GFP</sub>        | 300 ng            |                                         | 300 ng                                         | 300 ng                                           |           |
| sgRNA <sub>DMD</sub>        |                   | 300 ng                                  |                                                |                                                  |           |
| miR-21 inhibitor            |                   |                                         | 5 pmol                                         |                                                  |           |
| negative inhibitor          |                   |                                         |                                                | 5 pmol                                           |           |

| <b>Figure 3</b>                 |                   |                                         |                                                     |                                                      |           |
|---------------------------------|-------------------|-----------------------------------------|-----------------------------------------------------|------------------------------------------------------|-----------|
|                                 | Control Cas9 mRNA | sgRNA <sub>DMD</sub> (Negative control) | 4x miR-302-responsive Cas9 mRNA + miR-302 inhibitor | 4x miR-302-responsive Cas9 mRNA + negative inhibitor | Untreated |
| Control Cas9 mRNA               | 100 ng            | 100 ng                                  |                                                     |                                                      |           |
| 4x miR-302-responsive Cas9 mRNA |                   |                                         | 100 ng                                              | 100 ng                                               |           |
| sgRNA <sub>2GFP</sub>           | 300 ng            |                                         | 300 ng                                              | 300 ng                                               |           |
| sgRNA <sub>DMD</sub>            |                   | 300 ng                                  |                                                     |                                                      |           |
| miR-302 inhibitor               |                   |                                         | 5 pmol                                              |                                                      |           |
| negative inhibitor              |                   |                                         |                                                     | 5 pmol                                               |           |

| <b>Figure 4B-D</b>              |                   |                                         |                                 |           |
|---------------------------------|-------------------|-----------------------------------------|---------------------------------|-----------|
|                                 | Control Cas9 mRNA | sgRNA <sub>DMD</sub> (Negative control) | 4x miR-302-responsive Cas9 mRNA | Untreated |
| Control Cas9 mRNA               | 50 ng             | 50 ng                                   |                                 |           |
| 4x miR-302-responsive Cas9 mRNA |                   |                                         | 50 ng                           |           |
| sgRNA <sub>2GFP</sub>           | 150 ng            |                                         | 150 ng                          |           |
| sgRNA <sub>DMD</sub>            |                   | 150 ng                                  |                                 |           |

| <b>Figure 5B, C</b>         |                   |                             |                         |                                         |           |
|-----------------------------|-------------------|-----------------------------|-------------------------|-----------------------------------------|-----------|
|                             | Control L7Ae mRNA | miR-21-responsive L7Ae mRNA | Constitutive ON (-L7Ae) | sgRNA <sub>DMD</sub> (Negative control) | Untreated |
| Kt-Cas9 mRNA                | 5 ng              | 5 ng                        | 5 ng                    | 5 ng                                    |           |
| sgRNA <sub>2GFP</sub>       | 150 ng            | 150 ng                      | 150 ng                  |                                         |           |
| sgRNA <sub>DMD</sub>        |                   |                             |                         | 150 ng                                  |           |
| Control L7Ae mRNA           | 15 ng             |                             |                         | 15 ng                                   |           |
| miR-21-responsive L7Ae mRNA |                   | 15 ng                       |                         |                                         |           |

| <b>Supplementary Figure S2</b> |                      |                                |                                 |           |
|--------------------------------|----------------------|--------------------------------|---------------------------------|-----------|
|                                | Control<br>Cas9 mRNA | miR-21-responsive<br>Cas9 mRNA | miR-302-responsive<br>Cas9 mRNA | Untreated |
| Control Cas9 mRNA              | 100 ng               |                                |                                 |           |
| miR-21-responsive Cas9 mRNA    |                      | 100 ng                         |                                 |           |
| miR-302-responsive Cas9 mRNA   |                      |                                | 100 ng                          |           |
| sgRNA <sub>GFP</sub>           | 300 ng               | 300 ng                         | 300 ng                          |           |

| <b>Supplementary Figure S3B-D</b> |                      |                                |                                            |           |
|-----------------------------------|----------------------|--------------------------------|--------------------------------------------|-----------|
|                                   | Control<br>Cas9 mRNA | miR-21-responsive<br>Cas9 mRNA | sgRNA <sub>DMD</sub><br>(Negative control) | Untreated |
| Control Cas9 mRNA                 | 10 ng                |                                | 10 ng                                      |           |
| miR-21-responsive Cas9 mRNA       |                      | 10 ng                          |                                            |           |
| sgRNA <sub>Alu1</sub>             | 300 ng               | 300 ng                         |                                            |           |
| sgRNA <sub>DMD</sub>              |                      |                                | 300 ng                                     |           |

| <b>Supplementary Figure S4A, S5, S6B</b> |                      |                                            |                                                           |                                                            |           |
|------------------------------------------|----------------------|--------------------------------------------|-----------------------------------------------------------|------------------------------------------------------------|-----------|
|                                          | Control<br>Cas9 mRNA | sgRNA <sub>DMD</sub><br>(Negative control) | miR-302-responsive<br>Cas9 mRNA<br>+<br>miR-302 inhibitor | miR-302-responsive<br>Cas9 mRNA<br>+<br>negative inhibitor | Untreated |
| Control Cas9 mRNA                        | 100 ng               | 100 ng                                     |                                                           |                                                            |           |
| miR-302-responsive Cas9 mRNA             |                      |                                            | 100 ng                                                    | 100 ng                                                     |           |
| sgRNA <sub>GFP</sub>                     | 300 ng               |                                            | 300 ng                                                    | 300 ng                                                     |           |
| sgRNA <sub>DMD</sub>                     |                      | 300 ng                                     |                                                           |                                                            |           |
| miR-302 inhibitor                        |                      |                                            | 5 pmol                                                    |                                                            |           |
| negative inhibitor                       |                      |                                            |                                                           | 5 pmol                                                     |           |

| <b>Supplementary Figure S4B</b> |                      |                                            |                                                           |                                                            |           |
|---------------------------------|----------------------|--------------------------------------------|-----------------------------------------------------------|------------------------------------------------------------|-----------|
|                                 | Control<br>Cas9 mRNA | sgRNA <sub>DMD</sub><br>(Negative control) | miR-302-responsive<br>Cas9 mRNA<br>+<br>miR-302 inhibitor | miR-302-responsive<br>Cas9 mRNA<br>+<br>negative inhibitor | Untreated |
| Control Cas9 mRNA               | 100 ng               | 100 ng                                     |                                                           |                                                            |           |
| miR-302-responsive Cas9 mRNA    |                      |                                            | 100 ng                                                    | 100 ng                                                     |           |
| sgRNA <sub>2GFP</sub>           | 300 ng               |                                            | 300 ng                                                    | 300 ng                                                     |           |
| sgRNA <sub>DMD</sub>            |                      | 300 ng                                     |                                                           |                                                            |           |
| miR-302 inhibitor               |                      |                                            | 5 pmol                                                    |                                                            |           |
| negative inhibitor              |                      |                                            |                                                           | 5 pmol                                                     |           |

| <b>Supplementary Figure S4C</b> |                                                              |                                                               |           |
|---------------------------------|--------------------------------------------------------------|---------------------------------------------------------------|-----------|
|                                 | 4x miR-302-responsive<br>Cas9 mRNA<br>+<br>miR-302 inhibitor | 4x miR-302-responsive<br>Cas9 mRNA<br>+<br>negative inhibitor | Untreated |
| 4x miR-302-responsive Cas9 mRNA | 50 ng                                                        | 50 ng                                                         |           |
| sgRNA <sub>2GFP</sub>           | 300 ng                                                       | 300 ng                                                        |           |
| miR-302 inhibitor               | 5 pmol                                                       |                                                               |           |
| negative inhibitor              |                                                              | 5 pmol                                                        |           |

| <b>Supplementary Figure S7A</b> |                   |                             |           |
|---------------------------------|-------------------|-----------------------------|-----------|
|                                 | Control Cas9 mRNA | miR-21-responsive Cas9 mRNA | Untreated |
| Control Cas9 mRNA               | 100 ng            |                             |           |
| miR-21-responsive Cas9 mRNA     |                   | 100 ng                      |           |
| sgRNA <sub>GFP</sub>            | 300 ng            | 300 ng                      |           |

| <b>Supplementary Figure S7B</b> |                   |                              |           |
|---------------------------------|-------------------|------------------------------|-----------|
|                                 | Control Cas9 mRNA | miR-302-responsive Cas9 mRNA | Untreated |
| Control Cas9 mRNA               | 100 ng            |                              |           |
| miR-302-responsive Cas9 mRNA    |                   | 100 ng                       |           |
| sgRNA <sub>GFP</sub>            | 300 ng            | 300 ng                       |           |

| <b>Supplementary Figure S8</b> |           |           |
|--------------------------------|-----------|-----------|
|                                | BFP + Cy5 | Untreated |
| BFP mRNA                       | 100 ng    |           |
| sgRNA <sub>DMD</sub> -Cy5      | 300 ng    |           |

| <b>Supplementary Figure S9</b>  |                   |                                         |                                 |                                 |           |
|---------------------------------|-------------------|-----------------------------------------|---------------------------------|---------------------------------|-----------|
|                                 | Control Cas9 mRNA | sgRNA <sub>DMD</sub> (Negative control) | 1x miR-302-responsive Cas9 mRNA | 4x miR-302-responsive Cas9 mRNA | Untreated |
| Control Cas9 mRNA               | 100 ng            | 100 ng                                  |                                 |                                 |           |
| miR-302-responsive Cas9 mRNA    |                   |                                         | 100 ng                          |                                 |           |
| 4x miR-302-responsive Cas9 mRNA |                   |                                         |                                 | 100 ng                          |           |
| sgRNA <sub>2GFP</sub>           | 100 ng            |                                         | 100 ng                          | 100 ng                          |           |
| sgRNA <sub>DMD</sub>            |                   | 100 ng                                  |                                 |                                 |           |

## Supplementary References

1. Cho,S.W., Kim,S., Kim,Y., Kweon,J., Kim,H.S., Bae,S. and Kim,J.-S. (2014) Analysis of off-target effects of CRISPR/Cas-derived RNA-guided endonucleases and nickases. *Genome Res.*, **24**, 132–141.
2. Shen,Y.H., Zhang,L., Gan,Y., Wang,X., Wang,J., Lemaire,S.A., Coselli,J.S. and Wang,X.L. (2006) Up-regulation of PTEN (Phosphatase and Tensin Homolog Deleted on Chromosome Ten) Mediates p38 MAPK Stress Signal-induced Inhibition of Insulin Signaling A CROSS-TALK BETWEEN STRESS SIGNALING AND INSULIN SIGNALING IN RESISTIN-TREATED HUMAN ENDOTHELIAL CELL. *J. Biol. Chem.*, **281**, 7727–7736.
3. Kang,J., Perry,J.K., Pandey,V., Fielder,G.C., Mei,B., Qian,P.X., Wu,Z.S., Zhu,T., Liu,D.X. and Lobie,P.E. (2009) Artemin is oncogenic for human mammary carcinoma cells. *Oncogene*, **28**, 2034–2045.
4. Frankel,L.B., Christoffersen,N.R., Jacobsen,A., Lindow,M., Krogh,A. and Lund,A.H. (2008) Programmed Cell Death 4 (PDCD4) Is an Important Functional Target of the MicroRNA miR-21 in Breast Cancer Cells. *J. Biol. Chem.*, **283**, 1026–1033.
5. Wang,J., Guan,J., Lu,Z., Jin,J., Cai,Y., Wang,C. and Wang,F. (2015) Clinical and tumor significance of tropomyosin-1 expression levels in renal cell carcinoma. *Oncol. Rep.*, **33**, 1326–1334.
6. Schutyser,E., Su,Y., Yu,Y., Gouwy,M., Zaja-Milatovic,S., Damme,J. Van and Richmond,A. (2007) Hypoxia enhances CXCR4 expression in human microvascular endothelial cells and human melanoma cells. *Eur Cytokine Netw.*, **18**, 59–70.
7. James,J.M., Nalbandian,A. and Mukoyama,Y. (2013) TGF  $\beta$  signaling is required for sprouting lymphangiogenesis during lymphatic network development in the skin. *Development*, **140**, 3903–3914.
